# Supplementary material
Source: PubMed Central journal article supplement (PMC5491281)
Supplement: ASN.2016070768SupplementaryData.pdf [file ASN.2016070768SupplementaryData.pdf]

**APPENDIX I. Codes Used to Verify Medicare Status of Kidney Transplant Recipients in Medicare Inpatient and Carrier/Part B Files**

| <b>CPT Codes</b>             |                                                                                                                                                                                                                                                                                                                            |
|------------------------------|----------------------------------------------------------------------------------------------------------------------------------------------------------------------------------------------------------------------------------------------------------------------------------------------------------------------------|
| <b>CPT Code</b>              | <b>CPT Code Label</b>                                                                                                                                                                                                                                                                                                      |
| 00868                        | Anesthesia for extraperitoneal procedures in lower abdomen, including urinary tract; renal transplant (recipient)                                                                                                                                                                                                          |
| 50323                        | Backbench standard preparation of cadaver donor renal allograft prior to transplantation, including dissection and removal of perinephric fat, diaphragmatic and retroperitoneal attachments, excision of adrenal gland, and preparation of ureter(s), renal vein(s), and renal artery(s), ligating branches, as necessary |
| 50325                        | Backbench standard preparation of living donor renal allograft (open or laparoscopic) prior to transplantation, including dissection and removal of perinephric fat and preparation of ureter(s), renal vein(s), and renal artery(s), ligating branches, as necessary                                                      |
| 50327                        | Backbench reconstruction of cadaver or living donor renal allograft prior to transplantation; venous anastomosis, each                                                                                                                                                                                                     |
| 50328                        | Backbench reconstruction of cadaver or living donor renal allograft prior to transplantation; arterial anastomosis, each                                                                                                                                                                                                   |
| 50329                        | Backbench reconstruction of cadaver or living donor renal allograft prior to transplantation; ureteral anastomosis, each                                                                                                                                                                                                   |
| 50360                        | Renal allotransplantation, implantation of graft; without recipient nephrectomy                                                                                                                                                                                                                                            |
| 50365                        | Renal allotransplantation, implantation of graft; with recipient nephrectomy                                                                                                                                                                                                                                               |
| 50547                        | Laparoscopy, surgical; donor nephrectomy (including cold preservation), from living donor                                                                                                                                                                                                                                  |
| <b>ICD-9 Procedure Codes</b> |                                                                                                                                                                                                                                                                                                                            |
| <b>ICD-9 Code</b>            | <b>ICD-9 Code Label</b>                                                                                                                                                                                                                                                                                                    |
| 55.69                        | Other kidney transplantation                                                                                                                                                                                                                                                                                               |
| <b>ICD-9 Diagnosis Codes</b> |                                                                                                                                                                                                                                                                                                                            |
| 996.81                       | Complications of transplanted kidney                                                                                                                                                                                                                                                                                       |
| V42.0                        | Kidney replaced by transplant                                                                                                                                                                                                                                                                                              |

**APPENDIX II.** List of CMS Administrative Codes for Identifying Complications

**Lymphoma**

| <b>ICD-9 Code</b> | <b>ICD-9 Code Label</b>                                                                     |
|-------------------|---------------------------------------------------------------------------------------------|
| 200               | Lymphosarcoma and reticulosarcoma and other specified malignant tumors of lymphatic tissue  |
| 2001              | Lymphosarcoma                                                                               |
| 20010             | Lymphosarcoma, unspecified site, extranodal and solid organ sites                           |
| 20011             | Lymphosarcoma, lymph nodes of head, face, and neck                                          |
| 20012             | Lymphosarcoma, intrathoracic lymph nodes                                                    |
| 20013             | Lymphosarcoma, intra-abdominal lymph nodes                                                  |
| 20014             | Lymphosarcoma, lymph nodes of axilla and upper limb                                         |
| 20015             | Lymphosarcoma, lymph nodes of inguinal region and lower limb                                |
| 20016             | Lymphosarcoma, intrapelvic lymph nodes                                                      |
| 20017             | Lymphosarcoma, spleen                                                                       |
| 20018             | Lymphosarcoma, lymph nodes of multiple sites                                                |
| 2002              | Burkitt's tumor or lymphoma                                                                 |
| 20020             | Burkitt's tumor or lymphoma, unspecified site, extranodal and solid organ sites             |
| 20021             | Burkitt's tumor or lymphoma, lymph nodes of head, face, and neck                            |
| 20022             | Burkitt's tumor or lymphoma, intrathoracic lymph nodes                                      |
| 20023             | Burkitt's tumor or lymphoma, intra-abdominal lymph nodes                                    |
| 20024             | Burkitt's tumor or lymphoma, lymph nodes of axilla and upper limb                           |
| 20025             | Burkitt's tumor or lymphoma, lymph nodes of inguinal region and lower limb                  |
| 20026             | Burkitt's tumor or lymphoma, intrapelvic lymph nodes                                        |
| 20027             | Burkitt's tumor or lymphoma, spleen                                                         |
| 20028             | Burkitt's tumor or lymphoma, lymph nodes of multiple sites                                  |
| 20030             | Marginal zone lymphoma, unspecified site, extranodal and solid organ sites                  |
| 20031             | Marginal zone lymphoma, lymph nodes of head, face, and neck                                 |
| 20032             | Marginal zone lymphoma, intrathoracic lymph nodes                                           |
| 20033             | Marginal zone lymphoma, intraabdominal lymph nodes                                          |
| 20034             | Marginal zone lymphoma, lymph nodes of axilla and upper limb                                |
| 20035             | Marginal zone lymphoma, lymph nodes of inguinal region and lower limb                       |
| 20036             | Marginal zone lymphoma, intrapelvic lymph nodes                                             |
| 20037             | Marginal zone lymphoma, spleen                                                              |
| 20038             | Marginal zone lymphoma, lymph nodes of multiple sites                                       |
| 20040             | Mantle cell lymphoma, unspecified site, extranodal and solid organ sites                    |
| 20041             | Mantle cell lymphoma, lymph nodes of head, face, and neck                                   |
| 20042             | Mantle cell lymphoma, intrathoracic lymph nodes                                             |
| 20043             | Mantle cell lymphoma, intra-abdominal lymph nodes                                           |
| 20044             | Mantle cell lymphoma, lymph nodes of axilla and upper limb                                  |
| 20045             | Mantle cell lymphoma, lymph nodes of inguinal region and lower limb                         |
| 20046             | Mantle cell lymphoma, intrapelvic lymph nodes                                               |
| 20047             | Mantle cell lymphoma, spleen                                                                |
| 20048             | Mantle cell lymphoma, lymph nodes of multiple sites                                         |
| 20050             | Primary central nervous system lymphoma, unspecified site, extranodal and solid organ sites |
| 20051             | Primary central nervous system lymphoma, lymph nodes of head, face, and neck                |
| 20052             | Primary central nervous system lymphoma, intrathoracic lymph nodes                          |
| 20053             | Primary central nervous system lymphoma, intra-abdominal lymph nodes                        |
| 20054             | Primary central nervous system lymphoma, lymph nodes of axilla and upper limb               |
| 20055             | Primary central nervous system lymphoma, lymph nodes of inguinal region and lower limb      |
| 20056             | Primary central nervous system lymphoma, intrapelvic lymph nodes                            |
| 20057             | Primary central nervous system lymphoma, spleen                                             |
| 20058             | Primary central nervous system lymphoma, lymph nodes of multiple sites                      |

|       |                                                                                                               |
|-------|---------------------------------------------------------------------------------------------------------------|
| 20060 | Anaplastic large cell lymphoma, unspecified site, extranodal and solid organ sites                            |
| 20061 | Anaplastic large cell lymphoma, lymph nodes of head, face, and neck                                           |
| 20062 | Anaplastic large cell lymphoma, intrathoracic lymph nodes                                                     |
| 20063 | Anaplastic large cell lymphoma, intra-abdominal lymph nodes                                                   |
| 20064 | Anaplastic large cell lymphoma, lymph nodes of axilla and upper limb                                          |
| 20065 | Anaplastic large cell lymphoma, lymph nodes of inguinal region and lower limb                                 |
| 20066 | Anaplastic large cell lymphoma, intrapelvic lymph nodes                                                       |
| 20067 | Anaplastic large cell lymphoma, spleen                                                                        |
| 20068 | Anaplastic large cell lymphoma, lymph nodes of multiple sites                                                 |
| 20070 | Large cell lymphoma, unspecified site, extranodal and solid organ sites                                       |
| 20071 | Large cell lymphoma, lymph nodes of head, face, and neck                                                      |
| 20072 | Large cell lymphoma, intrathoracic lymph nodes                                                                |
| 20073 | Large cell lymphoma, intra-abdominal lymph nodes                                                              |
| 20074 | Large cell lymphoma, lymph nodes of axilla and upper limb                                                     |
| 20075 | Large cell lymphoma, lymph nodes of inguinal region and lower limb                                            |
| 20076 | Large cell lymphoma, intrapelvic lymph nodes                                                                  |
| 20077 | Large cell lymphoma, spleen                                                                                   |
| 20078 | Large cell lymphoma, lymph nodes of multiple sites                                                            |
| 2008  | Other named variants of lymphosarcoma and reticulosarcoma                                                     |
| 20080 | Other named variants of lymphosarcoma and reticulosarcoma, unspecified site, extranodal and solid organ sites |
| 20081 | Other named variants of lymphosarcoma and reticulosarcoma, lymph nodes of head, face, and neck                |
| 20082 | Other named variants of lymphosarcoma and reticulosarcoma, intrathoracic lymph nodes                          |
| 20083 | Other named variants of lymphosarcoma and reticulosarcoma, intra-abdominal lymph nodes                        |
| 20084 | Other named variants of lymphosarcoma and reticulosarcoma, lymph nodes of axilla and upper limb               |
| 20085 | Other named variants of lymphosarcoma and reticulosarcoma, lymph nodes of inguinal region and lower limb      |
| 20086 | Other named variants of lymphosarcoma and reticulosarcoma, intrapelvic lymph nodes                            |
| 20087 | Other named variants of lymphosarcoma and reticulosarcoma, spleen                                             |
| 20088 | Other named variants of lymphosarcoma and reticulosarcoma, lymph nodes of multiple sites                      |
| 201   | Hodgkin's disease                                                                                             |
| 2010  | Hodgkin's paragranuloma                                                                                       |
| 20100 | Hodgkin's paragranuloma, unspecified site, extranodal and solid organ sites                                   |
| 20101 | Hodgkin's paragranuloma, lymph nodes of head, face, and neck                                                  |
| 20102 | Hodgkin's paragranuloma, intrathoracic lymph nodes                                                            |
| 20103 | Hodgkin's paragranuloma, intra-abdominal lymph nodes                                                          |
| 20104 | Hodgkin's paragranuloma, lymph nodes of axilla and upper limb                                                 |
| 20105 | Hodgkin's paragranuloma, lymph nodes of inguinal region and lower limb                                        |
| 20106 | Hodgkin's paragranuloma, intrapelvic lymph nodes                                                              |
| 20107 | Hodgkin's paragranuloma, spleen                                                                               |
| 20108 | Hodgkin's paragranuloma, lymph nodes of multiple sites                                                        |
| 2011  | Hodgkin's granuloma                                                                                           |
| 20110 | Hodgkin's granuloma, unspecified site, extranodal and solid organ sites                                       |
| 20111 | Hodgkin's granuloma, lymph nodes of head, face, and neck                                                      |
| 20112 | Hodgkin's granuloma, intrathoracic lymph nodes                                                                |
| 20113 | Hodgkin's granuloma, intra-abdominal lymph nodes                                                              |
| 20114 | Hodgkin's granuloma, lymph nodes of axilla and upper limb                                                     |
| 20115 | Hodgkin's granuloma, lymph nodes of inguinal region and lower limb                                            |
| 20116 | Hodgkin's granuloma, intrapelvic lymph nodes                                                                  |
| 20117 | Hodgkin's granuloma, spleen                                                                                   |
| 20118 | Hodgkin's granuloma, lymph nodes of multiple sites                                                            |
| 2012  | Hodgkin's sarcoma                                                                                             |
| 20120 | Hodgkin's sarcoma, unspecified site, extranodal and solid organ sites                                         |
| 20121 | Hodgkin's sarcoma, lymph nodes of head, face, and neck                                                        |
| 20122 | Hodgkin's sarcoma, intrathoracic lymph nodes                                                                  |
| 20123 | Hodgkin's sarcoma, intra-abdominal lymph nodes                                                                |

|       |                                                                                                             |
|-------|-------------------------------------------------------------------------------------------------------------|
| 20124 | Hodgkin's sarcoma, lymph nodes of axilla and upper limb                                                     |
| 20125 | Hodgkin's sarcoma, lymph nodes of inguinal region and lower limb                                            |
| 20126 | Hodgkin's sarcoma, intrapelvic lymph nodes                                                                  |
| 20127 | Hodgkin's sarcoma, spleen                                                                                   |
| 20128 | Hodgkin's sarcoma, lymph nodes of multiple sites                                                            |
| 2014  | Hodgkin's disease, lymphocytic-histiocytic predominance                                                     |
| 20140 | Hodgkin's disease, lymphocytic-histiocytic predominance, unspecified site, extranodal and solid organ sites |
| 20141 | Hodgkin's disease, lymphocytic-histiocytic predominance, lymph nodes of head, face, and neck                |
| 20142 | Hodgkin's disease, lymphocytic-histiocytic predominance, intrathoracic lymph nodes                          |
| 20143 | Hodgkin's disease, lymphocytic-histiocytic predominance, intra-abdominal lymph nodes                        |
| 20144 | Hodgkin's disease, lymphocytic-histiocytic predominance, lymph nodes of axilla and upper limb               |
| 20145 | Hodgkin's disease, lymphocytic-histiocytic predominance, lymph nodes of inguinal region and lower limb      |
| 20146 | Hodgkin's disease, lymphocytic-histiocytic predominance, intrapelvic lymph nodes                            |
| 20147 | Hodgkin's disease, lymphocytic-histiocytic predominance, spleen                                             |
| 20148 | Hodgkin's disease, lymphocytic-histiocytic predominance, lymph nodes of multiple sites                      |
| 2015  | Hodgkin's disease, nodular sclerosis                                                                        |
| 20150 | Hodgkin's disease, nodular sclerosis, unspecified site, extranodal and solid organ sites                    |
| 20151 | Hodgkin's disease, nodular sclerosis, lymph nodes of head, face, and neck                                   |
| 20152 | Hodgkin's disease, nodular sclerosis, intrathoracic lymph nodes                                             |
| 20153 | Hodgkin's disease, nodular sclerosis, intra-abdominal lymph nodes                                           |
| 20154 | Hodgkin's disease, nodular sclerosis, lymph nodes of axilla and upper limb                                  |
| 20155 | Hodgkin's disease, nodular sclerosis, lymph nodes of inguinal region and lower limb                         |
| 20156 | Hodgkin's disease, nodular sclerosis, intrapelvic lymph nodes                                               |
| 20157 | Hodgkin's disease, nodular sclerosis, spleen                                                                |
| 20158 | Hodgkin's disease, nodular sclerosis, lymph nodes of multiple sites                                         |
| 2016  | Hodgkin's disease, mixed cellularity                                                                        |
| 20160 | Hodgkin's disease, mixed cellularity, unspecified site, extranodal and solid organ sites                    |
| 20161 | Hodgkin's disease, mixed cellularity, lymph nodes of head, face, and neck                                   |
| 20162 | Hodgkin's disease, mixed cellularity, intrathoracic lymph nodes                                             |
| 20163 | Hodgkin's disease, mixed cellularity, intra-abdominal lymph nodes                                           |
| 20164 | Hodgkin's disease, mixed cellularity, lymph nodes of axilla and upper limb                                  |
| 20165 | Hodgkin's disease, mixed cellularity, lymph nodes of inguinal region and lower limb                         |
| 20166 | Hodgkin's disease, mixed cellularity, intrapelvic lymph nodes                                               |
| 20167 | Hodgkin's disease, mixed cellularity, spleen                                                                |
| 20168 | Hodgkin's disease, mixed cellularity, lymph nodes of multiple sites                                         |
| 2017  | Hodgkin's disease, lymphocytic depletion                                                                    |
| 20170 | Hodgkin's disease, lymphocytic depletion, unspecified site, extranodal and solid organ sites                |
| 20171 | Hodgkin's disease, lymphocytic depletion, lymph nodes of head, face, and neck                               |
| 20172 | Hodgkin's disease, lymphocytic depletion, intrathoracic lymph nodes                                         |
| 20173 | Hodgkin's disease, lymphocytic depletion, intra-abdominal lymph nodes                                       |
| 20174 | Hodgkin's disease, lymphocytic depletion, lymph nodes of axilla and upper limb                              |
| 20175 | Hodgkin's disease, lymphocytic depletion, lymph nodes of inguinal region and lower limb                     |
| 20176 | Hodgkin's disease, lymphocytic depletion, intrapelvic lymph nodes                                           |
| 20177 | Hodgkin's disease, lymphocytic depletion, spleen                                                            |
| 20178 | Hodgkin's disease, lymphocytic depletion, lymph nodes of multiple sites                                     |
| 2019  | Hodgkin's disease unspecified type                                                                          |
| 20190 | Hodgkin's disease, unspecified type, unspecified site, extranodal and solid organ sites                     |
| 20191 | Hodgkin's disease, unspecified type, lymph nodes of head, face, and neck                                    |
| 20192 | Hodgkin's disease, unspecified type, intrathoracic lymph nodes                                              |
| 20193 | Hodgkin's disease, unspecified type, intra-abdominal lymph nodes                                            |
| 20194 | Hodgkin's disease, unspecified type, lymph nodes of axilla and upper limb                                   |
| 20195 | Hodgkin's disease, unspecified type, lymph nodes of inguinal region and lower limb                          |
| 20196 | Hodgkin's disease, unspecified type, intrapelvic lymph nodes                                                |
| 20197 | Hodgkin's disease, unspecified type, spleen                                                                 |

|       |                                                                                                                                  |
|-------|----------------------------------------------------------------------------------------------------------------------------------|
| 20198 | Hodgkin's disease, unspecified type, lymph nodes of multiple sites                                                               |
| 202   | Other malignant neoplasms of lymphoid and histiocytic tissue                                                                     |
| 2020  | Nodular lymphoma                                                                                                                 |
| 20200 | Nodular lymphoma, unspecified site, extranodal and solid organ sites                                                             |
| 20201 | Nodular lymphoma, lymph nodes of head, face, and neck                                                                            |
| 20202 | Nodular lymphoma, intrathoracic lymph nodes                                                                                      |
| 20203 | Nodular lymphoma, intra-abdominal lymph nodes                                                                                    |
| 20204 | Nodular lymphoma, lymph nodes of axilla and upper limb                                                                           |
| 20205 | Nodular lymphoma, lymph nodes of inguinal region and lower limb                                                                  |
| 20206 | Nodular lymphoma, intrapelvic lymph nodes                                                                                        |
| 20207 | Nodular lymphoma, spleen                                                                                                         |
| 20208 | Nodular lymphoma, lymph nodes of multiple sites                                                                                  |
| 2021  | Mycosis fungoides                                                                                                                |
| 20210 | Mycosis fungoides, unspecified site, extranodal and solid organ sites                                                            |
| 20211 | Mycosis fungoides, lymph nodes of head, face, and neck                                                                           |
| 20212 | Mycosis fungoides, intrathoracic lymph nodes                                                                                     |
| 20213 | Mycosis fungoides, intra-abdominal lymph nodes                                                                                   |
| 20214 | Mycosis fungoides, lymph nodes of axilla and upper limb                                                                          |
| 20215 | Mycosis fungoides, lymph nodes of inguinal region and lower limb                                                                 |
| 20216 | Mycosis fungoides, intrapelvic lymph nodes                                                                                       |
| 20217 | Mycosis fungoides, spleen                                                                                                        |
| 20218 | Mycosis fungoides, lymph nodes of multiple sites                                                                                 |
| 2022  | Sezary's disease                                                                                                                 |
| 20220 | Sezary's disease, unspecified site, extranodal and solid organ sites                                                             |
| 20221 | Sezary's disease, lymph nodes of head, face, and neck                                                                            |
| 20222 | Sezary's disease, intrathoracic lymph nodes                                                                                      |
| 20223 | Sezary's disease, intra-abdominal lymph nodes                                                                                    |
| 20224 | Sezary's disease, lymph nodes of axilla and upper limb                                                                           |
| 20225 | Sezary's disease, lymph nodes of inguinal region and lower limb                                                                  |
| 20226 | Sezary's disease, intrapelvic lymph nodes                                                                                        |
| 20227 | Sezary's disease, spleen                                                                                                         |
| 20228 | Sezary's disease, lymph nodes of multiple sites                                                                                  |
| 2027  | Peripheral t-cell lymphoma                                                                                                       |
| 20270 | Peripheral T cell lymphoma, unspecified site, extranodal and solid organ sites                                                   |
| 20271 | Peripheral T cell lymphoma, lymph nodes of head, face, and neck                                                                  |
| 20272 | Peripheral T cell lymphoma, intrathoracic lymph nodes                                                                            |
| 20273 | Peripheral T cell lymphoma, intra-abdominal lymph nodes                                                                          |
| 20274 | Peripheral T cell lymphoma, lymph nodes of axilla and upper limb                                                                 |
| 20275 | Peripheral T cell lymphoma, lymph nodes of inguinal region and lower limb                                                        |
| 20276 | Peripheral T cell lymphoma, intrapelvic lymph nodes                                                                              |
| 20277 | Peripheral T cell lymphoma, spleen                                                                                               |
| 20278 | Peripheral T cell lymphoma, lymph nodes of multiple sites                                                                        |
| 2028  | Other malignant lymphomas                                                                                                        |
| 20280 | Other malignant lymphomas, unspecified site, extranodal and solid organ sites                                                    |
| 20281 | Other malignant lymphomas, lymph nodes of head, face, and neck                                                                   |
| 20282 | Other malignant lymphomas, intrathoracic lymph nodes                                                                             |
| 20283 | Other malignant lymphomas, intra-abdominal lymph nodes                                                                           |
| 20284 | Other malignant lymphomas, lymph nodes of axilla and upper limb                                                                  |
| 20285 | Other malignant lymphomas, lymph nodes of inguinal region and lower limb                                                         |
| 20286 | Other malignant lymphomas, intrapelvic lymph nodes                                                                               |
| 20287 | Other malignant lymphomas, spleen                                                                                                |
| 20288 | Other malignant lymphomas, lymph nodes of multiple sites                                                                         |
| 2029  | Other and unspecified malignant neoplasms of lymphoid and histiocytic tissue                                                     |
| 20290 | Other and unspecified malignant neoplasms of lymphoid and histiocytic tissue, unspecified site, extranodal and solid organ sites |
| 20291 | Other and unspecified malignant neoplasms of lymphoid and histiocytic tissue, lymph nodes of head, face, and neck                |
| 20292 | Other and unspecified malignant neoplasms of lymphoid and histiocytic tissue, intrathoracic lymph nodes                          |
| 20293 | Other and unspecified malignant neoplasms of lymphoid and histiocytic tissue, intra-                                             |

|       |                                                                                                                             |
|-------|-----------------------------------------------------------------------------------------------------------------------------|
|       | abdominal lymph nodes                                                                                                       |
| 20294 | Other and unspecified malignant neoplasms of lymphoid and histiocytic tissue, lymph nodes of axilla and upper limb          |
| 20295 | Other and unspecified malignant neoplasms of lymphoid and histiocytic tissue, lymph nodes of inguinal region and lower limb |
| 20296 | Other and unspecified malignant neoplasms of lymphoid and histiocytic tissue, intrapelvic lymph nodes                       |
| 20297 | Other and unspecified malignant neoplasms of lymphoid and histiocytic tissue, spleen                                        |
| 20298 | Other and unspecified malignant neoplasms of lymphoid and histiocytic tissue, lymph nodes of multiple sites                 |
| 2038  | Other immunoproliferative neoplasms                                                                                         |
| 20380 | Other immunoproliferative neoplasms, without mention of having achieved remission                                           |
| 20381 | Other immunoproliferative neoplasms, in remission                                                                           |
| 20382 | Other immunoproliferative neoplasms, in relapse                                                                             |
| 2733  | Macroglobulinemia                                                                                                           |

## Sepsis

| ICD-9 Code | ICD-9 Code Label                                              |
|------------|---------------------------------------------------------------|
| 0380       | Streptococcal septicemia                                      |
| 0381       | Staphylococcal septicemia                                     |
| 0382       | Pneumococcal septicemia [Streptococcus pneumoniae septicemia] |
| 0383       | Septicemia due to anaerobes                                   |
| 0384       | Septicemia due to other gram-negative organisms               |
| 03840      | Septicemia due to gram-negative organism, unspecified         |
| 03841      | Septicemia due to hemophilus influenzae [H. influenzae]       |
| 03842      | Septicemia due to escherichia coli [E. coli]                  |
| 03843      | Septicemia due to pseudomonas                                 |
| 03844      | Septicemia due to serratia                                    |
| 03849      | Other septicemia due to gram-negative organisms               |
| 0388       | Other specified septicemias                                   |
| 0389       | Unspecified septicemia                                        |
| 03810      | Staphylococcal septicemia, unspecified                        |
| 03811      | Methicillin susceptible Staphylococcus aureus septicemia      |
| 03812      | Methicillin resistant Staphylococcus aureus septicemia        |
| 03819      | Other staphylococcal septicemia                               |
| 78552      | Septic shock                                                  |
| 7907       | Bacteremia                                                    |

## Melanoma

| <b>ICD-9 Code</b> | <b>ICD-9 Code Label</b>                                           |
|-------------------|-------------------------------------------------------------------|
| 172               | Malignant melanoma of skin                                        |
| 1720              | Malignant melanoma of skin of lip                                 |
| 1721              | Malignant melanoma of skin of eyelid, including canthus           |
| 1722              | Malignant melanoma of skin of ear and external auditory canal     |
| 1723              | Malignant melanoma of skin of other and unspecified parts of face |
| 1724              | Malignant melanoma of skin of scalp and neck                      |
| 1725              | Malignant melanoma of skin of trunk, except scrotum               |
| 1726              | Malignant melanoma of skin of upper limb, including shoulder      |
| 1727              | Malignant melanoma of skin of lower limb, including hip           |
| 1728              | Malignant melanoma of other specified sites of skin               |
| 1729              | Melanoma of skin, site unspecified                                |



**APPENDIX III. Resource Utilization-Based Cost Accounting and Calculation of Medicare Payments**

**1. Facility and Accommodation Costs from the Inpatient File:**

- a. Accommodations:
  - i. Determine number of inpatient critical care and non-critical care days from revenue centers in the Inpatient file.
  - ii. Multiply number of critical care/non-critical care days by average daily cost for each type (adjusted to 2008 values using CPI-M, hospital component - CCM: \$3,913.15; Non-CCM: \$1,282.51)

| <b>Non-Critical Care Revenue Centers</b>          | <b>Critical Care Revenue Centers</b> |
|---------------------------------------------------|--------------------------------------|
| 0100-0101 All-inclusive rate-room and board       | 0200-0209 Intensive care             |
| 0110-0119 Private medical or general              | 0210-0213, 0219 Coronary care        |
| 0120-0129 Semi-private 2 bed (medical or general) |                                      |
| 0130-0139 Semi-private 3 and 4 beds               |                                      |
| 0140-0149 Private (deluxe)                        |                                      |
| 0150-0159 Room & Board ward (medical or general)  |                                      |
| 0160, 0164, 0167 Other Room & Board               |                                      |

- b. Operating Room Time Cost (index admission only)
  - i. Determine operating room time using “best anesthesia chart time,” if available; If best anesthesia time missing, use claim anesthesia time from Physician/Carrier (Part B) file; if both best chart time and claim time missing, assign each patient median best anesthesia time by procedure
  - ii. Multiply anesthesia time by mean of OR time cost range and inflate to 2008 dollars (\$18.03/minute)
- b. Emergency Room Visit Fixed Costs (post-discharge only)
  - i. For post-discharge Part B records only, separate records into line items and locate place of service code 23 (“Emergency Room – Hospital”)
  - ii. Treat each unique ER date as separate visit, sum visits per patient
- c. Multiply by average ER visit cost, inflated to 2008 dollars (\$415.39)

**2. Service Costs from Carrier/Part B and Outpatient Files: (Note: Office visits, Home Care, SNF, and non-ER Outpatient use only section 2 methods)**

- a. Separate line items from Part B (each includes patient ID, CPT code, units count, place of service)
- b. Anesthesia - if first two digits of CPT code are 00 or 01, code indicates anesthesia billing
  - i. Apply standard CMS base units (2008 list) to each CPT code; if applicable, anesthesia modifier AD reduces base units to 3 per procedure for medical supervision
  - ii. Since time units count reflects anesthesia time in minutes divided by 1.5, divide reported time by 10 to determine number of 15-minute anesthesia time units
  - iii. Add base and time units for each line item, multiply by \$20.03 (un-weighted mean of locality conversion factors, number needs to be revised once national CF available); If applicable, anesthesia modifier QK reduces total AVUs by 50% of allowed rate for medical direction of multiple procedures
  - iv. Sum anesthesia line item costs by patient
- c. Other Services - apply method to all non-anesthesia Part B line items
  - i. Merge line item CPT with AMA CPT/RVU list (2008 file) to determine RVU for each
  - ii. Using place of service codes, determine whether facility or non-facility RVU is appropriate – for this cost estimate, treat outpatient hospitals as “non-facility” sites of care to adjust for facility component of service costs
  - iii. Multiply RVUs by line item service count (=1 in 99% of non-anesthesia cases)
  - iv. Multiply total RVUs by conversion factor (\$38.09 in 2008)
  - v. Sum line item costs by patient

**3. Time Frame Under Assessment for Resource Utilization-based Cost Accounting:**

- a. In-hospital costs account for all patient claims during the time period of the index hospitalization
- b. 365-day costs account for all in-hospital costs, plus any other bills (ER visits, and any bills in the Outpatient and Carrier/Part B files) that occurred within 365 days of admission, and any bills accrued during the entirety of any readmission that began within 365 days of admission.

*See next page for summary equation of the cost calculation*

**4. Summary Equation:**

$$C_{itx} = (D_{inp}^{CC} * 3,913.15 + D_{inp}^{NCC} * 1,282.51) + (T_{OR} * 18.03) + AU * 20.03 + ED * 415.39 + \sum RVU_j * 38.09$$

where:

$D_{inp}^{CC}$  = number of days in Critical Care

$D_{inp}^{NCC}$  = number of days on hospital floor

$T_{OR}$  = number of minutes in operating room

$AU$  = number of Anesthesia Units

$ED$  = number of emergency department (ED) visits

$RVU_j$  = number of all j RVUs from all bills over the defined time period that includes all outpatient visits

$$C_{itx,365} = C_{itx} + FC$$

where:

$C_{itx}$  = index transplant hospitalization cost as defined above

$FC = FC$  = post-transplant costs, including future hospitalizations accounted as the transplant hospitalization was above, as well as subsequent ED visits, outpatient visits, and physician bills

## 5. Payments calculation steps:

### Inpatient Hospital (Part A) File

- **Components**
  - Payment Made by Medicare: Claim Payment Amount (SAS alias: PMT\_AMT) + (Claim Pass Through Per Diem Amount (SAS alias: PER\_DIEM) \* Claim Utilization Day Count (SAS alias: UTIL\_DAY))
  - Payment Made by Beneficiary: NCH Beneficiary Inpatient Deductible Amount (SAS alias: DED\_AMT) + NCH Beneficiary Part A Coinsurance Liability Amount (SAS alias: COIN\_AMT) + NCH Beneficiary Blood Deductible Liability Amount (SAS alias: BLDDDEDAM)
  - Payment Made by Primary Payer: NCH Primary Payer Claim Paid Amount (SAS alias: PRPAYAMT)
- **Inpatient Payment = PMT\_AMT + (PER\_DIEM\*UTIL\_DAY) + DED\_AMT + COIN\_AMT + BLDDDEDAM + PRPAYAMT**

### Outpatient File

- **Components**
  - Payment Made by Medicare: Claim Payment Amount (SAS alias: PMT\_AMT)
  - Payment Made by Beneficiary: NCH Beneficiary Part B Coinsurance Liability Amount (SAS alias: PTB\_COIN) + NCH Beneficiary Part B Deductible Amount (SAS alias: PTB\_DED) + NCH Beneficiary Blood Deductible Liability Amount (SAS alias: BLDDDEDAM)
  - Payment Made by Primary Payer: NCH Primary Payer Claim Paid Amount (SAS alias: PRPAYAMT)
- **Outpatient Payment = PMT\_AMT + PTB\_COIN + PTB\_DED +BLDDDEDAM + PRPAYAMT**

### Physician/Carrier (Part B) File

- **Components**
  - Payment Made by Medicare: Claim Payment Amount (SAS alias: PMT\_AMT)
  - Payment Made by Beneficiary: Carrier Claim Cash Deductible Applied Amount (SAS alias: DEDAPPLY) + SUM of Line Coinsurance Amount (SAS alias: COINAMT)
  - Payment Made by Primary Payer: Carrier Claim Payer Paid Amount (SAS alias: PRPAYAMT)
- **Part B Payment = PMT\_AMT + DEDAPPLY + (sum of COINAMT lines 1 to 13) + PRPAYAMT**

### Final Total Payments

- Merge together the IP, OP, and PB payment amounts for each patient and take the sum
- Inflate payments to 2008 dollars

APPENDIX IV. Supplemental Tables and Figures

TABLE S1. Complete matching characteristics

| Alemtuzumab Match                           |                                    |                                        |                                    |                                 |                                      |                      |                                     |                     |
|---------------------------------------------|------------------------------------|----------------------------------------|------------------------------------|---------------------------------|--------------------------------------|----------------------|-------------------------------------|---------------------|
| Covariate                                   | All Alemtuzumab Cases<br>N = 5,332 | Matched Alemtuzumab Cases<br>N = 5,330 | Matched rATG Controls<br>N = 5,330 | All rATG Controls<br>N = 21,168 | Standardized Difference before Match | P-value before Match | Standardized Difference after Match | P-value after Match |
| Mean Age                                    | 50.5                               | 50.5                                   | 50.6                               | 50.2                            | 0.03                                 | 0.068                | 0.00                                | 0.854               |
| Age 65-90 (%)*                              | 858 (16)                           | 857 (16)                               | 857 (16)                           | 3324 (16)                       | 0.01                                 | 0.488                | 0.00                                | 1.000               |
| Male (%)                                    | 3186 (60)                          | 3185 (60)                              | 3201 (60)                          | 12489 (59)                      | 0.02                                 | 0.319                | -0.01                               | 0.767               |
| Black race (%)*                             | 1384 (26)                          | 1382 (26)                              | 1382 (26)                          | 6431 (30)                       | -0.10                                | < 0.001              | 0.00                                | 1.000               |
| Median neighborhood income (\$)             | 42763                              | 42766                                  | 42103                              | 42519                           | 0.02                                 | 0.566                | 0.04                                | 0.460               |
| Prior Kidney Transplant (%)*                | 604 (11)                           | 603 (11)                               | 603 (11)                           | 3228 (15)                       | -0.12                                | < 0.001              | 0.00                                | 1.000               |
| Peak PRA (%)*                               |                                    |                                        |                                    |                                 |                                      |                      |                                     |                     |
| 0-20%                                       | 3489 (65)                          | 3489 (65)                              | 3489 (65)                          | 13417 (63)                      | 0.04                                 | 0.005                | 0.00                                | 1.000               |
| 20-80%                                      | 608 (11)                           | 608 (11)                               | 608 (11)                           | 2915 (14)                       | -0.07                                | < 0.001              | 0.00                                | 1.000               |
| 80-100%                                     | 458 (9)                            | 458 (9)                                | 458 (9)                            | 2452 (12)                       | -0.10                                | < 0.001              | 0.00                                | 1.000               |
| Missing                                     | 777 (15)                           | 775 (15)                               | 775 (15)                           | 2384 (11)                       | 0.10                                 | < 0.001              | 0.00                                | 1.000               |
| HLA mismatch (%)*                           | 4773 (90)                          | 4772 (90)                              | 4772 (90)                          | 19134 (90)                      | -0.03                                | 0.056                | 0.00                                | 1.000               |
| Transplant Year                             | 2006.5                             | 2006.5                                 | 2006.5                             | 2006.2                          | 0.17                                 | < 0.001              | 0.01                                | 0.779               |
| Recipient BMI                               | 27.7                               | 27.7                                   | 27.6                               | 27.6                            | 0.03                                 | 0.193                | 0.02                                | 0.903               |
| Weight (kg)                                 | 81.0                               | 81.0                                   | 80.8                               | 80.4                            | 0.03                                 | 0.076                | 0.01                                | 0.872               |
| Missing BMI (%)*                            | 238 (4)                            | 236 (4)                                | 236 (4)                            | 1944 (9)                        | -0.19                                | < 0.001              | 0.00                                | 1.000               |
| Missing Weight (%)                          | 116 (2)                            | 115 (2)                                | 112 (2)                            | 969 (5)                         | -0.13                                | < 0.001              | 0.00                                | 0.893               |
| Missing BMI & Weight (%)*                   | 113 (2)                            | 112 (2)                                | 112 (2)                            | 965 (5)                         | -0.14                                | < 0.001              | 0.00                                | 1.000               |
| Time on Dialysis (%)                        |                                    |                                        |                                    |                                 |                                      |                      |                                     |                     |
| 0-1 years                                   | 1084 (20)                          | 1083 (20)                              | 1118 (21)                          | 3573 (17)                       | 0.09                                 | < 0.001              | -0.02                               | 0.416               |
| 1-3 years                                   | 1426 (27)                          | 1426 (27)                              | 1388 (26)                          | 5181 (24)                       | 0.05                                 | < 0.001              | 0.02                                | 0.416               |
| 3-6 years                                   | 1300 (24)                          | 1300 (24)                              | 1306 (25)                          | 5531 (26)                       | -0.04                                | 0.009                | 0.00                                | 0.910               |
| 6-10 years                                  | 451 (8)                            | 451 (8)                                | 464 (9)                            | 1825 (9)                        | -0.01                                | 0.722                | -0.01                               | 0.678               |
| >10 years                                   | 98 (2)                             | 98 (2)                                 | 81 (2)                             | 534 (3)                         | -0.05                                | 0.003                | 0.02                                | 0.228               |
| Missing                                     | 973 (18)                           | 972 (18)                               | 973 (18)                           | 4524 (21)                       | -0.08                                | < 0.001              | 0.00                                | 1.000               |
| Cause of ESRD (%)                           |                                    |                                        |                                    |                                 |                                      |                      |                                     |                     |
| Glomerulonephritis                          | 1040 (20)                          | 1040 (20)                              | 1035 (19)                          | 4034 (19)                       | 0.01                                 | 0.459                | 0.00                                | 0.922               |
| HTN                                         | 1079 (20)                          | 1078 (20)                              | 1041 (20)                          | 4365 (21)                       | -0.01                                | 0.544                | 0.02                                | 0.382               |
| PKD                                         | 410 (8)                            | 410 (8)                                | 382 (7)                            | 1463 (7)                        | 0.03                                 | 0.049                | 0.02                                | 0.319               |
| Congenital                                  | 77 (1)                             | 77 (1)                                 | 65 (1)                             | 336 (2)                         | -0.01                                | 0.496                | 0.02                                | 0.353               |
| Other                                       | 1441 (27)                          | 1440 (27)                              | 1494 (28)                          | 6506 (31)                       | -0.08                                | < 0.001              | -0.02                               | 0.250               |
| Diabetes (%)                                | 1769 (33)                          | 1768 (33)                              | 1771 (33)                          | 6549 (31)                       | 0.05                                 | 0.002                | -0.00                               | 0.967               |
| Hepatitis C+ (%)                            | 172 (3)                            | 172 (3)                                | 162 (3)                            | 1230 (6)                        | -0.12                                | < 0.001              | 0.01                                | 0.617               |
| Donor type                                  |                                    |                                        |                                    |                                 |                                      |                      |                                     |                     |
| Living (%)                                  | 1858 (35)                          | 1856 (35)                              | 1880 (35)                          | 6192 (29)                       | 0.12                                 | < 0.001              | -0.01                               | 0.641               |
| Deceased (%)                                | 2703 (51)                          | 2703 (51)                              | 2734 (51)                          | 12186 (58)                      | -0.14                                | < 0.001              | -0.01                               | 0.561               |
| Extended Criteria (%)                       | 771 (14)                           | 771 (15)                               | 716 (13)                           | 2790 (13)                       | 0.04                                 | 0.015                | 0.03                                | 0.131               |
| Propensity score for receipt of Alemtuzumab | 0.221                              | 0.221                                  | 0.218                              | 0.196                           | 0.40                                 | < 0.001              | 0.04                                | 0.366               |
| Immunosuppression (not used for match)      |                                    |                                        |                                    |                                 |                                      |                      |                                     |                     |
| MMF or Mycophenolate sodium                 | 4532 (85)                          | 4530 (85)                              | 5070 (95)                          | 20135 (95)                      | -0.34                                | < 0.001              | -0.34                               | < 0.001             |

|                                |           |           |           |            |       |         |       |         |
|--------------------------------|-----------|-----------|-----------|------------|-------|---------|-------|---------|
| <b>Prednisone use</b>          | 1544 (29) | 1543 (29) | 3529 (66) | 14685 (69) | -0.88 | < 0.001 | -0.81 | < 0.001 |
| <b>Calcineurin or mTOR use</b> |           |           |           |            |       |         |       |         |
| Tacrolimus (%)                 | 4516 (85) | 4514 (85) | 4590 (86) | 17929 (85) | 0.00  | 1.000   | -0.04 | 0.040   |
| Cyclosporine (%)               | 345 (6)   | 345 (7)   | 411 (8)   | 1876 (9)   | -0.09 | < 0.001 | -0.05 | 0.014   |
| Sirolimus (%)                  | 74 (1)    | 74 (1)    | 122 (2)   | 499 (2)    | -0.07 | < 0.001 | -0.07 | < 0.001 |
| None (%)                       | 397 (7)   | 397 (7)   | 207 (4)   | 864 (4)    | 0.14  | < 0.001 | 0.15  | < 0.001 |

\* Variable matched exactly

Abbreviations: rATG – rabbit antithymocyte globulin. PRA – Panel reactive antibody; HLA – human leukocyte antibody; BMI – body mass index; ESRD – end-stage renal disease; MMF – mycophenolate mofetile; mTOR – mammalian target of rapamycin

| <b>Basiliximab Match</b>                      |                                            |                                                |                                            |                                         |                                             |                             |                                            |                            |
|-----------------------------------------------|--------------------------------------------|------------------------------------------------|--------------------------------------------|-----------------------------------------|---------------------------------------------|-----------------------------|--------------------------------------------|----------------------------|
| <b>Covariate</b>                              | <b>All Basiliximab Cases<br/>N = 9,391</b> | <b>Matched Basiliximab Cases<br/>N = 9,378</b> | <b>Matched rATG Controls<br/>N = 9,378</b> | <b>All rATG Controls<br/>N = 21,168</b> | <b>Standardized Difference before Match</b> | <b>P-value before Match</b> | <b>Standardized Difference after Match</b> | <b>P-value after Match</b> |
| <b>Mean Age</b>                               | 51.3                                       | 51.3                                           | 51.3                                       | 50.2                                    | 0.08                                        | < 0.001                     | 0.00                                       | 0.884                      |
| <b>Age 65-90 (%)*</b>                         | 1763 (19)                                  | 1755 (19)                                      | 1755 (19)                                  | 3324 (16)                               | 0.08                                        | < 0.001                     | 0.00                                       | 1.000                      |
| <b>Male (%)</b>                               | 6000 (64)                                  | 5993 (64)                                      | 5928 (63)                                  | 12489 (59)                              | 0.10                                        | < 0.001                     | 0.01                                       | 0.332                      |
| <b>Black race (%)*</b>                        | 1787 (19)                                  | 1781 (19)                                      | 1781 (19)                                  | 6431 (30)                               | -0.27                                       | < 0.001                     | 0.00                                       | 1.000                      |
| <b>Median neighborhood income (\$)</b>        | 42813                                      | 42798                                          | 43198                                      | 42519                                   | 0.02                                        | 0.107                       | -0.03                                      | 0.097                      |
| <b>Prior Kidney Transplant (%)*</b>           | 643 (7)                                    | 640 (7)                                        | 640 (7)                                    | 3228 (15)                               | -0.27                                       | < 0.001                     | 0.00                                       | 1.000                      |
| <b>Peak PRA (%)*</b>                          |                                            |                                                |                                            |                                         |                                             |                             |                                            |                            |
| 0-20%                                         | 6937 (74)                                  | 6931 (74)                                      | 6931 (74)                                  | 13417 (63)                              | 0.23                                        | < 0.001                     | 0.00                                       | 1.000                      |
| 20-80%                                        | 879 (9)                                    | 879 (9)                                        | 879 (9)                                    | 2915 (14)                               | -0.14                                       | < 0.001                     | 0.00                                       | 1.000                      |
| 80-100%                                       | 401 (4)                                    | 400 (4)                                        | 400 (4)                                    | 2452 (12)                               | -0.27                                       | < 0.001                     | 0.00                                       | 1.000                      |
| Missing                                       | 1174 (13)                                  | 1168 (12)                                      | 1168 (12)                                  | 2384 (11)                               | 0.04                                        | 0.002                       | 0.00                                       | 1.000                      |
| <b>HLA mismatch (%)*</b>                      | 8335 (89)                                  | 8330 (89)                                      | 8330 (89)                                  | 19134 (90)                              | -0.05                                       | < 0.001                     | 0.00                                       | 1.000                      |
| <b>Transplant Year</b>                        | 2005.9                                     | 2005.9                                         | 2006.0                                     | 2006.2                                  | -0.17                                       | < 0.001                     | -0.02                                      | 0.232                      |
| <b>Recipient BMI</b>                          | 27.4                                       | 27.4                                           | 27.4                                       | 27.6                                    | -0.03                                       | 0.153                       | 0.00                                       | 0.538                      |
| <b>Weight (kg)</b>                            | 80.5                                       | 80.5                                           | 80.5                                       | 80.4                                    | 0.01                                        | 0.204                       | 0.00                                       | 0.996                      |
| Missing BMI (%)*                              | 583 (6)                                    | 573 (6)                                        | 573 (6)                                    | 1944 (9)                                | -0.11                                       | < 0.001                     | 0.00                                       | 1.000                      |
| Missing Weight (%)                            | 215 (2)                                    | 210 (2)                                        | 212 (2)                                    | 969 (5)                                 | -0.13                                       | < 0.001                     | 0.00                                       | 0.961                      |
| Missing BMI & Weight (%)*                     | 215 (2)                                    | 210 (2)                                        | 210 (2)                                    | 965 (5)                                 | -0.13                                       | < 0.001                     | 0.00                                       | 1.000                      |
| <b>Time on Dialysis (%)</b>                   |                                            |                                                |                                            |                                         |                                             |                             |                                            |                            |
| 0-1 years                                     | 2011 (21)                                  | 2010 (21)                                      | 2043 (22)                                  | 3573 (17)                               | 0.12                                        | < 0.001                     | -0.01                                      | 0.570                      |
| 1-3 years                                     | 2623 (28)                                  | 2618 (28)                                      | 2650 (28)                                  | 5181 (24)                               | 0.08                                        | < 0.001                     | -0.01                                      | 0.615                      |
| 3-6 years                                     | 2144 (23)                                  | 2143 (23)                                      | 2180 (23)                                  | 5531 (26)                               | -0.08                                       | < 0.001                     | -0.01                                      | 0.533                      |
| 6-10 years                                    | 573 (6)                                    | 572 (6)                                        | 577 (6)                                    | 1825 (9)                                | -0.10                                       | < 0.001                     | 0.00                                       | 0.903                      |
| >10 years                                     | 126 (1)                                    | 126 (1)                                        | 126 (1)                                    | 534 (3)                                 | -0.09                                       | < 0.001                     | 0.00                                       | 1.000                      |
| Missing                                       | 1914 (20)                                  | 1909 (20)                                      | 1802 (19)                                  | 4524 (21)                               | -0.02                                       | 0.052                       | 0.03                                       | 0.052                      |
| <b>Cause of ESRD (%)</b>                      |                                            |                                                |                                            |                                         |                                             |                             |                                            |                            |
| Glomerulonephritis                            | 1842 (20)                                  | 1841 (20)                                      | 1844 (20)                                  | 4034 (19)                               | 0.01                                        | 0.257                       | 0.00                                       | 0.971                      |
| HTN                                           | 1764 (19)                                  | 1764 (19)                                      | 1785 (19)                                  | 4365 (21)                               | -0.05                                       | < 0.001                     | -0.01                                      | 0.709                      |
| PKD                                           | 777 (8)                                    | 776 (8)                                        | 769 (8)                                    | 1463 (7)                                | 0.05                                        | < 0.001                     | 0.00                                       | 0.873                      |
| Congenital                                    | 166 (2)                                    | 166 (2)                                        | 156 (2)                                    | 336 (2)                                 | 0.01                                        | 0.262                       | 0.01                                       | 0.613                      |
| Other                                         | 2680 (29)                                  | 2673 (29)                                      | 2644 (28)                                  | 6506 (31)                               | -0.05                                       | < 0.001                     | 0.01                                       | 0.650                      |
| <b>Diabetes (%)</b>                           | 3037 (32)                                  | 3032 (32)                                      | 3042 (32)                                  | 6549 (31)                               | 0.03                                        | 0.015                       | 0.00                                       | 0.888                      |
| <b>Hepatitis C+ (%)</b>                       | 494 (5)                                    | 494 (5)                                        | 486 (5)                                    | 1230 (6)                                | -0.02                                       | 0.056                       | 0.00                                       | 0.818                      |
| <b>Donor type</b>                             |                                            |                                                |                                            |                                         |                                             |                             |                                            |                            |
| Living (%)                                    | 3368 (36)                                  | 3364 (36)                                      | 3336 (36)                                  | 6192 (29)                               | 0.14                                        | < 0.001                     | 0.01                                       | 0.681                      |
| Deceased (%)                                  | 5050 (54)                                  | 5042 (54)                                      | 5018 (54)                                  | 12186 (58)                              | -0.08                                       | < 0.001                     | 0.01                                       | 0.736                      |
| Extended Criteria (%)                         | 973 (10)                                   | 972 (10)                                       | 1024 (11)                                  | 2790 (13)                               | -0.09                                       | < 0.001                     | -0.02                                      | 0.227                      |
| Propensity score for receipt of basiliximab   | 0.348                                      | 0.348                                          | 0.346                                      | 0.289                                   | 0.56                                        | < 0.001                     | 0.02                                       | 0.160                      |
| <b>Immunosuppression (not used for match)</b> |                                            |                                                |                                            |                                         |                                             |                             |                                            |                            |
| <b>MMF or Mycophenolate sodium</b>            | 8848 (94)                                  | 8836 (94)                                      | 8932 (95)                                  | 20135 (95)                              | -0.04                                       | 0.001                       | -0.05                                      | 0.002                      |
| <b>Prednisone use</b>                         | 8152 (87)                                  | 8143 (87)                                      | 6177 (66)                                  | 14685 (69)                              | 0.43                                        | < 0.001                     | 0.52                                       | < 0.001                    |
| <b>Calcineurin or mTOR use</b>                |                                            |                                                |                                            |                                         |                                             |                             |                                            |                            |
| Tacrolimus (%)                                | 6491 (69)                                  | 6482 (69)                                      | 7792 (83)                                  | 17929 (85)                              | -0.38                                       | < 0.001                     | -0.34                                      | < 0.001                    |
| Cyclosporine (%)                              | 1974 (21)                                  | 1972 (21)                                      | 970 (10)                                   | 1876 (9)                                | 0.35                                        | < 0.001                     | 0.30                                       | < 0.001                    |
| Sirolimus (%)                                 | 415 (4)                                    | 414 (4)                                        | 235 (3)                                    | 499 (2)                                 | 0.11                                        | < 0.001                     | 0.11                                       | < 0.001                    |

|          |         |         |         |         |      |         |      |         |
|----------|---------|---------|---------|---------|------|---------|------|---------|
| None (%) | 511 (5) | 510 (5) | 381 (4) | 864 (4) | 0.06 | < 0.001 | 0.06 | < 0.001 |
|----------|---------|---------|---------|---------|------|---------|------|---------|

\* Variable matched exactly

Abbreviations: rATG – rabbit antithymocyte globulin. PRA – Panel reactive antibody; HLA – human leukocyte antibody; BMI – body mass index; ESRD – end-stage renal disease; MMF – mycophenolate mofetile; mTOR – mammalian target of rapamycin

**TABLE S2.** Outcomes after kidney transplantation comparing elderly (age  $\geq 65$ ) matched pairs to non-elderly matched pairs; rabbit antithymocyte globulin (rATG) is the reference group

| Hazard Ratio =<br>Alemtuzumab vs. rATG or<br>Basiliximab vs. rATG                                                                                                                                                                                                                                                                                                                                                                                                                                                                                                                                                                                                                                                                                                                                                                                                                                                                                                                                                                      | Elderly Patients         |                                 | Non-elderly Patients     |                                 | Elderly vs. Non-elderly<br>Interaction                         |                                 |
|----------------------------------------------------------------------------------------------------------------------------------------------------------------------------------------------------------------------------------------------------------------------------------------------------------------------------------------------------------------------------------------------------------------------------------------------------------------------------------------------------------------------------------------------------------------------------------------------------------------------------------------------------------------------------------------------------------------------------------------------------------------------------------------------------------------------------------------------------------------------------------------------------------------------------------------------------------------------------------------------------------------------------------------|--------------------------|---------------------------------|--------------------------|---------------------------------|----------------------------------------------------------------|---------------------------------|
|                                                                                                                                                                                                                                                                                                                                                                                                                                                                                                                                                                                                                                                                                                                                                                                                                                                                                                                                                                                                                                        | Hazard Ratio<br>(95% CI) | Paired Cox<br>Model P-<br>value | Hazard Ratio<br>(95% CI) | Paired Cox<br>Model P-<br>value | Paired Cox<br>Model<br>Interaction<br>Hazard Ratio<br>(95% CI) | Paired Cox<br>Model P-<br>value |
| <b>Alemtuzumab-rATG Matches</b>                                                                                                                                                                                                                                                                                                                                                                                                                                                                                                                                                                                                                                                                                                                                                                                                                                                                                                                                                                                                        |                          |                                 |                          |                                 |                                                                |                                 |
| Death                                                                                                                                                                                                                                                                                                                                                                                                                                                                                                                                                                                                                                                                                                                                                                                                                                                                                                                                                                                                                                  | 1.24<br>(1.02, 1.50)     | 0.030                           | 1.11<br>(0.98, 1.25)     | 0.088*                          | 1.12<br>(0.89, 1.40)                                           | 0.333                           |
| Death or allograft failure                                                                                                                                                                                                                                                                                                                                                                                                                                                                                                                                                                                                                                                                                                                                                                                                                                                                                                                                                                                                             | 1.25<br>(1.04, 1.51)     | 0.016                           | 1.17<br>(1.06, 1.28)     | 0.001                           | 1.08<br>(0.88, 1.32)                                           | 0.483                           |
| Death or sepsis                                                                                                                                                                                                                                                                                                                                                                                                                                                                                                                                                                                                                                                                                                                                                                                                                                                                                                                                                                                                                        | 1.14<br>(0.95, 1.37)     | 0.171                           | 0.89<br>(0.81, 0.98)     | 0.016                           | 1.28<br>(1.04, 1.57)                                           | 0.021                           |
| Death or lymphoma                                                                                                                                                                                                                                                                                                                                                                                                                                                                                                                                                                                                                                                                                                                                                                                                                                                                                                                                                                                                                      | 1.34<br>(1.04, 1.72)     | 0.023                           | 1.09<br>(0.93, 1.27)     | 0.310*                          | 1.23<br>(0.92, 1.66)                                           | 0.168                           |
| Death or melanoma                                                                                                                                                                                                                                                                                                                                                                                                                                                                                                                                                                                                                                                                                                                                                                                                                                                                                                                                                                                                                      | 1.40<br>(1.09, 1.81)     | 0.009                           | 1.08<br>(0.91, 1.27)     | 0.375*                          | 1.30<br>(0.96, 1.76)                                           | 0.089                           |
| <b>Basiliximab-rATG Matches</b>                                                                                                                                                                                                                                                                                                                                                                                                                                                                                                                                                                                                                                                                                                                                                                                                                                                                                                                                                                                                        |                          |                                 |                          |                                 |                                                                |                                 |
| Death                                                                                                                                                                                                                                                                                                                                                                                                                                                                                                                                                                                                                                                                                                                                                                                                                                                                                                                                                                                                                                  | 1.01<br>(0.89, 1.15)     | 0.869                           | 1.11<br>(1.02, 1.21)     | 0.012                           | 0.91<br>(0.78, 1.06)                                           | 0.222                           |
| Death or allograft failure                                                                                                                                                                                                                                                                                                                                                                                                                                                                                                                                                                                                                                                                                                                                                                                                                                                                                                                                                                                                             | 0.95<br>(0.84, 1.07)     | 0.397                           | 1.06<br>(0.99, 1.14)     | 0.075*                          | 0.89<br>(0.78, 1.03)                                           | 0.110                           |
| Death or sepsis                                                                                                                                                                                                                                                                                                                                                                                                                                                                                                                                                                                                                                                                                                                                                                                                                                                                                                                                                                                                                        | 0.99<br>(0.87, 1.12)     | 0.844                           | 1.07<br>(1.00, 1.15)     | 0.064                           | 0.92<br>(0.80, 1.07)                                           | 0.291                           |
| Death or lymphoma                                                                                                                                                                                                                                                                                                                                                                                                                                                                                                                                                                                                                                                                                                                                                                                                                                                                                                                                                                                                                      | 1.04<br>(0.87, 1.23)     | 0.694                           | 1.15<br>(1.03, 1.30)     | 0.015                           | 0.90<br>(0.73, 1.10)                                           | 0.302                           |
| Death or melanoma                                                                                                                                                                                                                                                                                                                                                                                                                                                                                                                                                                                                                                                                                                                                                                                                                                                                                                                                                                                                                      | 1.01<br>(0.85, 1.2)      | 0.931                           | 1.15<br>(1.02, 1.30)     | 0.021                           | 0.88<br>(0.71, 1.08)                                           | 0.212                           |
| <p>Reference group = rATG<br/> Hazard ratios, 95% confidence intervals, and P-values computed using a paired Cox proportional hazards model. The paired Cox model interaction test adds an interaction term for elderly status and reports the outcome hazard for elderly patients vs. non-elderly patients.<br/> Outcomes that include those derived from Medicare claims (those using sepsis, lymphoma, melanoma) are censored at 3 years post-transplant<br/> * Subsequent analyses suggested that hazards were not proportional over time (see Kaplan-Meier figures). For alemtuzumab-rATG pairs, the five-year differences between pairs in death was 0.3% (-1.1%, 1.7%), while the three year differences between pairs in death or lymphoma were 0.8% (-0.5%, 2.2%) and five-year differences in death or melanoma were 0.6% (-0.8%, 2.1%).<br/> For basiliximab-rATG, the five-year differences between pairs in death or allograft failure was 1.3% (-0.1%, 2.6%). Confidence intervals were derived using bootstrapping.</p> |                          |                                 |                          |                                 |                                                                |                                 |



**TABLE S3.** Outcomes after kidney transplantation, non-black matched pairs; rATG is the reference group

| <b>Subset of Matched Non-black Patients Only</b>                                                                                                                                                                                                                                                                                                                                                                                                                                            | <b>Hazard Ratio</b> | <b>95% CI Lower</b> | <b>95% CI Upper</b> | <b>Paired Cox Model P-value</b> |
|---------------------------------------------------------------------------------------------------------------------------------------------------------------------------------------------------------------------------------------------------------------------------------------------------------------------------------------------------------------------------------------------------------------------------------------------------------------------------------------------|---------------------|---------------------|---------------------|---------------------------------|
| <b>Alemtuzumab-rATG Match (N = 3,948 non-black matched pairs)</b>                                                                                                                                                                                                                                                                                                                                                                                                                           |                     |                     |                     |                                 |
| Death                                                                                                                                                                                                                                                                                                                                                                                                                                                                                       | 1.16                | 1.04                | 1.30                | 0.009                           |
| Death or allograft failure                                                                                                                                                                                                                                                                                                                                                                                                                                                                  | 1.25                | 1.14                | 1.38                | <0.001                          |
| Death or sepsis                                                                                                                                                                                                                                                                                                                                                                                                                                                                             | 0.98                | 0.89                | 1.08                | 0.634                           |
| Death or lymphoma                                                                                                                                                                                                                                                                                                                                                                                                                                                                           | 1.14                | 0.98                | 1.34                | 0.089                           |
| Death or melanoma                                                                                                                                                                                                                                                                                                                                                                                                                                                                           | 1.15                | 0.98                | 1.34                | 0.091                           |
| <b>Basiliximab-rATG Matches (N = 7,597 non-black matched pairs)</b>                                                                                                                                                                                                                                                                                                                                                                                                                         |                     |                     |                     |                                 |
| Death                                                                                                                                                                                                                                                                                                                                                                                                                                                                                       | 1.06                | 0.98                | 1.15                | 0.159                           |
| Death or allograft failure                                                                                                                                                                                                                                                                                                                                                                                                                                                                  | 1.00                | 0.94                | 1.07                | 0.917                           |
| Death or sepsis                                                                                                                                                                                                                                                                                                                                                                                                                                                                             | 1.05                | 0.98                | 1.12                | 0.209*                          |
| Death or lymphoma                                                                                                                                                                                                                                                                                                                                                                                                                                                                           | 1.12                | 1.01                | 1.25                | 0.036                           |
| Death or melanoma                                                                                                                                                                                                                                                                                                                                                                                                                                                                           | 1.11                | 1.00                | 1.24                | 0.056                           |
| Reference group = rATG<br>Outcomes that include those derived from Medicare claims (those using sepsis, lymphoma, melanoma) are censored at 3 years post-transplant<br>Hazard ratios, 95% confidence intervals, and P-values computed using a paired Cox proportional hazards model<br>* Subsequent analyses suggested the possibility that hazards were non-proportional over time (see Table S6. The three-year difference with a bootstrapped confidence interval was 1.9% (0.3%, 3.2%). |                     |                     |                     |                                 |

**TABLE S4.** The following grids show the counts among the alemtuzumab-rATG and basiliximab-rATG pairs for various combinations of the composite death, allograft failure, and acute rejection variable by one year.

The Stuart -Maxwell test was used to compare *any* differences in outcomes between the two agents across the grid.

McNemar's tests were performed on two additional outcomes derived from these grids: 1) any outcome versus healthy and alive without rejection or graft failure and 2) any acute rejection

These McNemar's tests showed that relative to rATG recipients, alemtuzumab and basiliximab recipients had significantly higher risk of any acute rejection after one year. Alemtuzumab patients also had significantly lower probability of being alive and healthy relative to rATG patients. The results for these analyses are included in the *Results* section of the main manuscript.

### Odds of Rejection vs. No Rejection

| Match               | N Pairs | Case Rate (%) | Matched Control Rate (%) | Odds Ratio | Lower 95% CI | Upper 95% CI | P-value |
|---------------------|---------|---------------|--------------------------|------------|--------------|--------------|---------|
| Alemtuzumab to rATG | 5,330   | 9.9           | 7.7                      | 1.31       | 1.14         | 1.51         | < 0.001 |
| Basiliximab to rATG | 9,378   | 8.1           | 7.1                      | 1.16       | 1.04         | 1.30         | 0.007   |

P-values calculated using the McNemar test.

Compared to alemtuzumab and basiliximab matched pairs, rATG patients showed statistically different risk of the composite death, allograft failure, or acute rejection (Stuart-Maxwell  $p < 0.01$ ). Alemtuzumab patients were 0.83 times less likely to be alive with no rejection or graft failure at one-year post-transplant relative to rATG patients (95% CI = 0.74, 0.93;  $p < 0.01$ ). Relative to rATG recipients, alemtuzumab and basiliximab patients had higher odds of acute rejection by one year (alemtuzumab OR = 1.31; 95% CI = 1.14, 1.51,  $p < 0.01$ ; basiliximab OR = 1.16; 95% CI = 1.04, 1.30,  $p < 0.01$ ).

| Composite Outcome                                           | Alemtuzumab Cases<br>N = 5,330 | Matched rATG Controls<br>N = 5,330 | P-value* | Alemtuzumab Cases<br>N = 5,330 | Matched rATG Controls<br>N = 5,330 |
|-------------------------------------------------------------|--------------------------------|------------------------------------|----------|--------------------------------|------------------------------------|
| Alive, Healthy (without Allograft Failure or Rejection)     | 4,495                          | 4,618                              | >0.001   | 84.3%                          | 86.6%                              |
| Alive + Rejection (without Allograft Failure)               | 403                            | 347                                | 0.038    | 7.6%                           | 6.5%                               |
| Alive + Allograft Failure                                   | 237                            | 183                                | 0.007    | 4.4%                           | 3.4%                               |
| Death (regardless of Allograft Failure or Rejection status) | 195                            | 182                                | 0.523    | 3.7%                           | 3.4%                               |
| <b>Composite Outcome P-value<sup>^</sup></b>                | 0.004                          |                                    |          | 100.0%                         | 100.0%                             |

\* P-values for paired differences in the row's outcome were calculated using the McNemar test.

<sup>^</sup> The P-value for paired differences across all composite outcomes was calculated using the Stuart-Maxwell test.

| Composite Outcome                                           | Basiliximab Cases<br>N = 9,378 | Matched rATG Controls<br>N = 9,378 | P-value* | Basiliximab Cases<br>N = 9,378 | Matched rATG Controls<br>N = 9,378 |
|-------------------------------------------------------------|--------------------------------|------------------------------------|----------|--------------------------------|------------------------------------|
| Alive, Healthy (without Allograft Failure or Rejection)     | 8,066                          | 8,105                              | 0.420    | 86.0%                          | 86.4%                              |
| Alive + Rejection (without Allograft Failure)               | 642                            | 570                                | 0.035    | 6.8%                           | 6.1%                               |
| Alive + Allograft Failure                                   | 270                            | 318                                | 0.049    | 2.9%                           | 3.4%                               |
| Death (regardless of Allograft Failure or Rejection status) | 400                            | 385                                | 0.607    | 4.3%                           | 4.1%                               |
| <b>Composite Outcome P-value<sup>^</sup></b>                | 0.036                          |                                    |          | 100.0%                         | 100.0%                             |

\* P-values for paired differences in the row's outcome were calculated using the McNemar test.

<sup>^</sup> The P-value for paired differences across all composite outcomes was calculated using the Stuart-Maxwell test.

**TABLE S5.** Time to outcome summary

|                                                                                                                                           | <b>Alemtuzumab events N (%)</b> | <b>rATG events N (%)</b> | <b>Median Alemtuzumab follow-up days</b> | <b>Median rATG follow-up days</b> |
|-------------------------------------------------------------------------------------------------------------------------------------------|---------------------------------|--------------------------|------------------------------------------|-----------------------------------|
| <b>Alemtuzumab-rATG Match</b>                                                                                                             |                                 |                          |                                          |                                   |
| Death                                                                                                                                     | 944 (18%)                       | 843 (16%)                | 1804                                     | 1818                              |
| Death or allograft failure                                                                                                                | 1501 (28%)                      | 1305 (24%)               | 1654                                     | 1706                              |
| Death or sepsis                                                                                                                           | 1289 (24%)                      | 1340 (25%)               | 853.5                                    | 841                               |
| Death or lymphoma                                                                                                                         | 531 (10%)                       | 482 (9%)                 | 1037                                     | 1057                              |
| Death or melanoma                                                                                                                         | 506 (9%)                        | 459 (9%)                 | 1044                                     | 1060.5                            |
| <b>Basiliximab-rATG Matches</b>                                                                                                           |                                 |                          |                                          |                                   |
|                                                                                                                                           | <b>Basiliximab events N (%)</b> | <b>rATG events N (%)</b> | <b>Median Basiliximab follow-up days</b> | <b>Median rATG follow-up days</b> |
| Death                                                                                                                                     | 1902 (20%)                      | 1753 (19%)               | 1996                                     | 2013                              |
| Death or allograft failure                                                                                                                | 2717 (29%)                      | 2602 (28%)               | 1862                                     | 1867                              |
| Death or sepsis                                                                                                                           | 2521 (27%)                      | 2367 (25%)               | 980.5                                    | 991                               |
| Death or lymphoma                                                                                                                         | 1023 (11%)                      | 913 (10%)                | 1095.75                                  | 1095.75                           |
| Death or melanoma                                                                                                                         | 979 (10%)                       | 875 (9%)                 | 1095.75                                  | 1095.75                           |
| Outcomes that include those derived from Medicare claims (those using sepsis, lymphoma, melanoma) are censored at 3 years post-transplant |                                 |                          |                                          |                                   |
| Number of days for follow-up reflect either an event or censor time for each outcome.                                                     |                                 |                          |                                          |                                   |

**TABLE S6.** Cox proportional hazards models adjusting for case effect and adding case x time interactions to test non-proportionality

| <b>Analysis</b>    | <b>Match<br/>(Case Group)</b> | <b>Outcome</b>             | <b>N Pairs</b> | <b>Case x Time<br/>Interaction<br/>Hazard ratio</b> | <b>95% CI<br/>Lower</b> | <b>95% CI<br/>Upper</b> | <b>Paired Cox<br/>Model<br/>P-value</b> |
|--------------------|-------------------------------|----------------------------|----------------|-----------------------------------------------------|-------------------------|-------------------------|-----------------------------------------|
| Primary Analysis   | Alemtuzumab                   | Death                      | 5330           | 1.05                                                | 0.98                    | 1.13                    | 0.162                                   |
| Primary Analysis   | Alemtuzumab                   | Death or allograft failure | 5330           | 1.00                                                | 0.97                    | 1.04                    | 0.875                                   |
| Primary Analysis   | Alemtuzumab                   | Death or sepsis            | 5330           | 1.02                                                | 0.99                    | 1.05                    | 0.128                                   |
| Primary Analysis   | Alemtuzumab                   | Death or lymphoma          | 5330           | 1.09                                                | 1.01                    | 1.17                    | 0.020                                   |
| Primary Analysis   | Alemtuzumab                   | Death or melanoma          | 5330           | 1.08                                                | 0.98                    | 1.19                    | 0.117                                   |
| Primary Analysis   | Basiliximab                   | Death                      | 9378           | 1.02                                                | 0.97                    | 1.07                    | 0.530                                   |
| Primary Analysis   | Basiliximab                   | Death or allograft failure | 9378           | 1.03                                                | 1.00                    | 1.05                    | 0.041                                   |
| Primary Analysis   | Basiliximab                   | Death or sepsis            | 9378           | 1.02                                                | 1.00                    | 1.05                    | 0.028                                   |
| Primary Analysis   | Basiliximab                   | Death or lymphoma          | 9378           | 1.01                                                | 0.97                    | 1.06                    | 0.678                                   |
| Primary Analysis   | Basiliximab                   | Death or melanoma          | 9378           | 1.03                                                | 0.97                    | 1.10                    | 0.390                                   |
| Both Prednisone    | Alemtuzumab                   | Death                      | 513            | 1.11                                                | 0.85                    | 1.45                    | 0.461                                   |
| Both Prednisone    | Alemtuzumab                   | Death or allograft failure | 513            | 0.94                                                | 0.83                    | 1.08                    | 0.391                                   |
| Both Prednisone    | Alemtuzumab                   | Death or sepsis            | 513            | 1.07                                                | 0.96                    | 1.19                    | 0.238                                   |
| Both Prednisone    | Alemtuzumab                   | Death or lymphoma          | 513            | 0.99                                                | 0.69                    | 1.43                    | 0.971                                   |
| Both Prednisone    | Alemtuzumab                   | Death or melanoma          | 513            | 1.01                                                | 0.69                    | 1.48                    | 0.964                                   |
| Both Prednisone    | Basiliximab                   | Death                      | 2882           | 0.91                                                | 0.82                    | 1.01                    | 0.075                                   |
| Both Prednisone    | Basiliximab                   | Death or allograft failure | 2882           | 1.01                                                | 0.96                    | 1.06                    | 0.823                                   |
| Both Prednisone    | Basiliximab                   | Death or sepsis            | 2882           | 1.03                                                | 1.00                    | 1.07                    | 0.092                                   |
| Both Prednisone    | Basiliximab                   | Death or lymphoma          | 2882           | 0.92                                                | 0.83                    | 1.01                    | 0.090                                   |
| Both Prednisone    | Basiliximab                   | Death or melanoma          | 2882           | 0.82                                                | 0.70                    | 0.96                    | 0.015                                   |
| Neither Prednisone | Alemtuzumab                   | Death                      | 973            | 0.78                                                | 0.58                    | 1.03                    | 0.080                                   |
| Neither Prednisone | Alemtuzumab                   | Death or allograft failure | 973            | 0.90                                                | 0.79                    | 1.03                    | 0.123                                   |
| Neither Prednisone | Alemtuzumab                   | Death or sepsis            | 973            | 0.97                                                | 0.90                    | 1.05                    | 0.442                                   |
| Neither Prednisone | Alemtuzumab                   | Death or lymphoma          | 973            | 0.80                                                | 0.58                    | 1.10                    | 0.173                                   |
| Neither Prednisone | Alemtuzumab                   | Death or melanoma          | 973            | 0.67                                                | 0.44                    | 1.02                    | 0.061                                   |
| Neither Prednisone | Basiliximab                   | Death                      | 299            | 1.08                                                | 0.60                    | 1.96                    | 0.795                                   |
| Neither Prednisone | Basiliximab                   | Death or allograft failure | 299            | 0.85                                                | 0.64                    | 1.12                    | 0.242                                   |
| Neither Prednisone | Basiliximab                   | Death or sepsis            | 299            | 0.97                                                | 0.84                    | 1.13                    | 0.703                                   |
| Neither Prednisone | Basiliximab                   | Death or lymphoma          | 299            | 0.40                                                | 0.13                    | 1.18                    | 0.095                                   |
| Neither Prednisone | Basiliximab                   | Death or melanoma          | 299            | 0.51                                                | 0.20                    | 1.32                    | 0.164                                   |
| Elderly            | Alemtuzumab                   | Death                      | 857            | 0.94                                                | 0.82                    | 1.07                    | 0.360                                   |
| Elderly            | Alemtuzumab                   | Death or allograft failure | 857            | 0.96                                                | 0.90                    | 1.04                    | 0.325                                   |
| Elderly            | Alemtuzumab                   | Death or sepsis            | 857            | 1.00                                                | 0.95                    | 1.07                    | 0.902                                   |
| Elderly            | Alemtuzumab                   | Death or lymphoma          | 857            | 1.04                                                | 0.93                    | 1.16                    | 0.484                                   |
| Elderly            | Alemtuzumab                   | Death or melanoma          | 857            | 0.97                                                | 0.82                    | 1.15                    | 0.726                                   |
| Elderly            | Basiliximab                   | Death                      | 1755           | 1.07                                                | 0.97                    | 1.17                    | 0.185                                   |
| Elderly            | Basiliximab                   | Death or allograft failure | 1755           | 1.01                                                | 0.96                    | 1.06                    | 0.800                                   |
| Elderly            | Basiliximab                   | Death or sepsis            | 1755           | 1.04                                                | 1.00                    | 1.09                    | 0.052                                   |
| Elderly            | Basiliximab                   | Death or lymphoma          | 1755           | 1.08                                                | 0.97                    | 1.21                    | 0.176                                   |
| Elderly            | Basiliximab                   | Death or melanoma          | 1755           | 1.07                                                | 0.95                    | 1.22                    | 0.282                                   |
| Non-Elderly        | Alemtuzumab                   | Death                      | 4473           | 1.11                                                | 1.02                    | 1.22                    | 0.020                                   |
| Non-Elderly        | Alemtuzumab                   | Death or allograft failure | 4473           | 1.01                                                | 0.98                    | 1.05                    | 0.487                                   |
| Non-Elderly        | Alemtuzumab                   | Death or sepsis            | 4473           | 1.03                                                | 1.00                    | 1.07                    | 0.078                                   |
| Non-Elderly        | Alemtuzumab                   | Death or lymphoma          | 4473           | 1.13                                                | 1.02                    | 1.24                    | 0.016                                   |
| Non-Elderly        | Alemtuzumab                   | Death or melanoma          | 4473           | 1.15                                                | 1.01                    | 1.30                    | 0.031                                   |
| Non-Elderly        | Basiliximab                   | Death                      | 7623           | 1.00                                                | 0.94                    | 1.05                    | 0.905                                   |
| Non-Elderly        | Basiliximab                   | Death or allograft failure | 7623           | 1.03                                                | 1.00                    | 1.06                    | 0.030                                   |
| Non-Elderly        | Basiliximab                   | Death or sepsis            | 7623           | 1.02                                                | 0.99                    | 1.04                    | 0.163                                   |
| Non-Elderly        | Basiliximab                   | Death or lymphoma          | 7623           | 1.00                                                | 0.95                    | 1.05                    | 0.910                                   |
| Non-Elderly        | Basiliximab                   | Death or melanoma          | 7623           | 1.01                                                | 0.94                    | 1.09                    | 0.716                                   |
| Non-Black          | Alemtuzumab                   | Death                      | 3948           | 1.06                                                | 0.97                    | 1.15                    | 0.194                                   |

| <b>Analysis</b> | <b>Match<br/>(Case Group)</b> | <b>Outcome</b>             | <b>N Pairs</b> | <b>Case x Time<br/>Interaction<br/>Hazard ratio</b> | <b>95% CI<br/>Lower</b> | <b>95% CI<br/>Upper</b> | <b>Paired Cox<br/>Model<br/>P-value</b> |
|-----------------|-------------------------------|----------------------------|----------------|-----------------------------------------------------|-------------------------|-------------------------|-----------------------------------------|
| Non-Black       | Alemtuzumab                   | Death or Allograft Failure | 3948           | 1.00                                                | 0.96                    | 1.04                    | 0.841                                   |
| Non-Black       | Alemtuzumab                   | Death or Sepsis            | 3948           | 1.02                                                | 0.98                    | 1.05                    | 0.321                                   |
| Non-Black       | Alemtuzumab                   | Death or Lymphoma          | 3948           | 1.08                                                | 1.00                    | 1.16                    | 0.053                                   |
| Non-Black       | Alemtuzumab                   | Death or Melanoma          | 3948           | 1.05                                                | 0.95                    | 1.17                    | 0.346                                   |
| Non-Black       | Basiliximab                   | Death                      | 7597           | 1.01                                                | 0.96                    | 1.07                    | 0.633                                   |
| Non-Black       | Basiliximab                   | Death or Allograft Failure | 7597           | 1.02                                                | 1.00                    | 1.05                    | 0.099                                   |
| Non-Black       | Basiliximab                   | Death or Sepsis            | 7597           | 1.03                                                | 1.01                    | 1.06                    | <i>0.011</i>                            |
| Non-Black       | Basiliximab                   | Death or Lymphoma          | 7597           | 1.01                                                | 0.96                    | 1.06                    | 0.771                                   |
| Non-Black       | Basiliximab                   | Death or Melanoma          | 7597           | 1.04                                                | 0.97                    | 1.12                    | 0.268                                   |

Hazard ratios, 95% confidence intervals, and P-values computed using a paired Cox proportional hazards model  
Outcomes that include those derived from Medicare claims (those using sepsis, lymphoma or melanoma) are censored at 3 years post-transplant

**TABLE S7.** Three-year and five-year outcome estimates and bootstrapped differences

The table below presents outcome estimates derived from the Kaplan-Meier estimator and bootstrapped differences at five years for death and death or allograft failure and three years for Medicare-derived outcomes. Where Cox models did not meet the proportional hazards assumption, the Prentice-Wilcoxon test is also reported, using all available data for death and death or allograft failure and at 3 years of follow-up for Medicare outcomes. Neither the Prentice-Wilcoxon test nor time-specific estimates rely on the proportional hazards assumption.

| <b>Analysis</b>    | <b>Match (Case Group)</b> | <b>Outcome</b>             | <b>N Pairs</b> | <b>Time Point Assessed</b> | <b>Case Estimate (%)</b> | <b>Control Estimate (%)</b> | <b>Difference in % and Bootstrapped 95% CI</b> | <b>Paired Cox Model P-value</b> | <b>Prentice-Wilcoxon P-value*</b> |
|--------------------|---------------------------|----------------------------|----------------|----------------------------|--------------------------|-----------------------------|------------------------------------------------|---------------------------------|-----------------------------------|
| Primary Analysis   | Alemtuzumab               | Death                      | 5330           | 5 years                    | 15.2                     | 14.5                        | 0.7<br>(-0.7, 2.1)                             | <0.01                           |                                   |
| Primary Analysis   | Alemtuzumab               | Death or Allograft Failure | 5330           | 5 years                    | 25.9                     | 22.9                        | 3.0<br>(1.3, 4.7)                              | <0.001                          |                                   |
| Primary Analysis   | Alemtuzumab               | Death or Sepsis            | 5330           | 3 years                    | 27.8                     | 28.6                        | -0.8<br>(-2.7, 1.0)                            | 0.127                           |                                   |
| Primary Analysis   | Alemtuzumab               | Death or Lymphoma          | 5330           | 3 years                    | 12.4                     | 11.0                        | 1.3<br>(-0.1, 2.7)                             | 0.037                           | 0.102                             |
| Primary Analysis   | Alemtuzumab               | Death or Melanoma          | 5330           | 3 years                    | 11.9                     | 10.7                        | 1.2<br>(0.0, 2.5)                              | 0.029                           |                                   |
| Primary Analysis   | Basiliximab               | Death                      | 9378           | 5 years                    | 16.3                     | 15.2                        | 1.2<br>(0.1, 2.2)                              | 0.028                           |                                   |
| Primary Analysis   | Basiliximab               | Death or Allograft Failure | 9378           | 5 years                    | 24.7                     | 23.6                        | 1.1<br>(-0.1, 2.4)                             | 0.251                           | 0.106                             |
| Primary Analysis   | Basiliximab               | Death or Sepsis            | 9378           | 3 years                    | 29.7                     | 27.8                        | 1.9<br>(0.4, 3.2)                              | 0.126                           | 0.036                             |
| Primary Analysis   | Basiliximab               | Death or Lymphoma          | 9378           | 3 years                    | 12.6                     | 11.2                        | 1.4<br>(0.4, 2.4)                              | 0.025                           |                                   |
| Primary Analysis   | Basiliximab               | Death or Melanoma          | 9378           | 3 years                    | 12.1                     | 10.8                        | 1.3<br>(0.3, 2.3)                              | 0.052                           |                                   |
| Both Prednisone    | Alemtuzumab               | Death                      | 513            | 5 years                    | 14.7                     | 12.4                        | 2.3<br>(-2.2, 6.4)                             | 0.072                           |                                   |
| Both Prednisone    | Alemtuzumab               | Death or Allograft Failure | 513            | 5 years                    | 25.1                     | 21.1                        | 4.0<br>(-1.4, 9.3)                             | 0.026                           |                                   |
| Both Prednisone    | Alemtuzumab               | Death or Sepsis            | 513            | 3 years                    | 31.5                     | 26.3                        | 5.2<br>(-1.0, 11.4)                            | 0.460                           |                                   |
| Both Prednisone    | Alemtuzumab               | Death or Lymphoma          | 513            | 3 years                    | 10.3                     | 10.1                        | 0.2<br>(-3.9, 3.9)                             | 0.821                           |                                   |
| Both Prednisone    | Alemtuzumab               | Death or Melanoma          | 513            | 3 years                    | 9.5                      | 9.3                         | 0.2<br>(-3.9, 4.1)                             | 0.718                           |                                   |
| Both Prednisone    | Basiliximab               | Death                      | 2882           | 5 years                    | 16.5                     | 15.7                        | 0.8<br>(-1.2, 2.8)                             | 0.562                           |                                   |
| Both Prednisone    | Basiliximab               | Death or Allograft Failure | 2882           | 5 years                    | 24.7                     | 23.9                        | 0.8<br>(-1.6, 3.2)                             | 0.623                           |                                   |
| Both Prednisone    | Basiliximab               | Death or Sepsis            | 2882           | 3 years                    | 30.2                     | 29.3                        | 0.9<br>(-1.6, 3.5)                             | 0.575                           |                                   |
| Both Prednisone    | Basiliximab               | Death or Lymphoma          | 2882           | 3 years                    | 12.1                     | 12.4                        | -0.3<br>(-2.3, 1.5)                            | 0.756                           |                                   |
| Both Prednisone    | Basiliximab               | Death or Melanoma          | 2882           | 3 years                    | 11.6                     | 11.7                        | -0.1<br>(-1.9, 1.8)                            | 0.783                           | 0.907                             |
| Neither Prednisone | Alemtuzumab               | Death                      | 973            | 5 years                    | 11.8                     | 11.7                        | 0.1<br>(-3.2, 3.2)                             | 0.576                           |                                   |
| Neither Prednisone | Alemtuzumab               | Death or Allograft Failure | 973            | 5 years                    | 19.8                     | 18.4                        | 1.5<br>(-2.1, 5.1)                             | 0.183                           |                                   |
| Neither Prednisone | Alemtuzumab               | Death or Sepsis            | 973            | 3 years                    | 25.1                     | 23.9                        | 1.2<br>(-3.2, 5.6)                             | 0.866                           |                                   |
| Neither Prednisone | Alemtuzumab               | Death or Lymphoma          | 973            | 3 years                    | 11.3                     | 10.0                        | 1.3<br>(-2.2, 4.8)                             | 0.167                           |                                   |

| <b>Analysis</b>    | <b>Match (Case Group)</b> | <b>Outcome</b>             | <b>N Pairs</b> | <b>Time Point Assessed</b> | <b>Case Estimate (%)</b> | <b>Control Estimate (%)</b> | <b>Difference in % and Bootstrapped 95% CI</b> | <b>Paired Cox Model P-value</b> | <b>Prentice-Wilcoxon P-value*</b> |
|--------------------|---------------------------|----------------------------|----------------|----------------------------|--------------------------|-----------------------------|------------------------------------------------|---------------------------------|-----------------------------------|
| Neither Prednisone | Alemtuzumab               | Death or Melanoma          | 973            | 3 years                    | 10.5                     | 9.6                         | 0.8<br>(-2.4, 4.2)                             | 0.245                           |                                   |
| Neither Prednisone | Basiliximab               | Death                      | 299            | 5 years                    | 14.1                     | 12.7                        | 1.3<br>(-4.6, 7.5)                             | 0.553                           |                                   |
| Neither Prednisone | Basiliximab               | Death or Allograft Failure | 299            | 5 years                    | 19.0                     | 16.6                        | 2.4<br>(-4.0, 9.6)                             | 0.357                           |                                   |
| Neither Prednisone | Basiliximab               | Death or Sepsis            | 299            | 3 years                    | 24.8                     | 19.3                        | 5.5<br>(-1.6, 13.2)                            | 0.916                           |                                   |
| Neither Prednisone | Basiliximab               | Death or Lymphoma          | 299            | 3 years                    | 12.5                     | 9.4                         | 3.1<br>(-2.7, 8.1)                             | 0.869                           |                                   |
| Neither Prednisone | Basiliximab               | Death or Melanoma          | 299            | 3 years                    | 12.3                     | 11.1                        | 1.1<br>(-4.5, 7.1)                             | 0.528                           |                                   |
| Elderly            | Alemtuzumab               | Death                      | 857            | 5 years                    | 28.5                     | 25.3                        | 3.2<br>(-1.2, 7.7)                             | 0.030                           |                                   |
| Elderly            | Alemtuzumab               | Death or Allograft Failure | 857            | 5 years                    | 33.8                     | 28.9                        | 4.9<br>(0.6, 9.2)                              | 0.016                           |                                   |
| Elderly            | Alemtuzumab               | Death or Sepsis            | 857            | 3 years                    | 38.2                     | 35.8                        | 2.5<br>(-2.7, 7.3)                             | 0.171                           |                                   |
| Elderly            | Alemtuzumab               | Death or Lymphoma          | 857            | 3 years                    | 23.2                     | 19.1                        | 4.2<br>(-0.1, 8.6)                             | 0.023                           |                                   |
| Elderly            | Alemtuzumab               | Death or Melanoma          | 857            | 3 years                    | 23.4                     | 18.9                        | 4.5<br>(0.0, 8.9)                              | 0.009                           |                                   |
| Elderly            | Basiliximab               | Death                      | 1755           | 5 years                    | 29.2                     | 27.8                        | 1.4<br>(-1.7, 4.7)                             | 0.869                           |                                   |
| Elderly            | Basiliximab               | Death or Allograft Failure | 1755           | 5 years                    | 32.8                     | 32.6                        | 0.2<br>(-2.9, 3.3)                             | 0.397                           |                                   |
| Elderly            | Basiliximab               | Death or Sepsis            | 1755           | 3 years                    | 37.7                     | 36.4                        | 1.3<br>(-2.3, 4.6)                             | 0.844                           |                                   |
| Elderly            | Basiliximab               | Death or Lymphoma          | 1755           | 3 years                    | 21.4                     | 20.7                        | 0.7<br>(-2.3, 3.5)                             | 0.694                           |                                   |
| Elderly            | Basiliximab               | Death or Melanoma          | 1755           | 3 years                    | 21.2                     | 20.7                        | 0.5<br>(-2.5, 3.4)                             | 0.931                           |                                   |
| Non-Elderly        | Alemtuzumab               | Death                      | 4473           | 5 years                    | 12.7                     | 12.4                        | 0.3<br>(-1.1, 1.7)                             | 0.088                           | 0.096                             |
| Non-Elderly        | Alemtuzumab               | Death or Allograft Failure | 4473           | 5 years                    | 24.4                     | 21.7                        | 2.7<br>(0.7, 4.5)                              | 0.001                           |                                   |
| Non-Elderly        | Alemtuzumab               | Death or Sepsis            | 4473           | 3 years                    | 25.8                     | 27.2                        | -1.5<br>(-3.4, 0.6)                            | 0.016                           |                                   |
| Non-Elderly        | Alemtuzumab               | Death or Lymphoma          | 4473           | 3 years                    | 10.2                     | 9.4                         | 0.8<br>(-0.5, 2.2)                             | 0.310                           | 0.482                             |
| Non-Elderly        | Alemtuzumab               | Death or Melanoma          | 4473           | 3 years                    | 9.6                      | 9.0                         | 0.6<br>(-0.8, 2.1)                             | 0.375                           | 0.608                             |
| Non-Elderly        | Basiliximab               | Death                      | 7623           | 5 years                    | 13.4                     | 12.3                        | 1.1<br>(0.0, 2.2)                              | 0.012                           |                                   |
| Non-Elderly        | Basiliximab               | Death or Allograft Failure | 7623           | 5 years                    | 22.8                     | 21.6                        | 1.3<br>(-0.1, 2.6)                             | 0.075                           | 0.056                             |
| Non-Elderly        | Basiliximab               | Death or Sepsis            | 7623           | 3 years                    | 27.8                     | 25.8                        | 2.0<br>(0.6, 3.4)                              | 0.064                           |                                   |
| Non-Elderly        | Basiliximab               | Death or Lymphoma          | 7623           | 3 years                    | 10.6                     | 9.0                         | 1.6<br>(0.6, 2.6)                              | 0.015                           |                                   |
| Non-Elderly        | Basiliximab               | Death or Melanoma          | 7623           | 3 years                    | 10.0                     | 8.5                         | 1.5<br>(0.5, 2.6)                              | 0.021                           |                                   |
| Non-Black          | Alemtuzumab               | Death                      | 3948           | 5 years                    | 15.9                     | 14.7                        | 1.1<br>(-0.6, 2.8)                             | 0.009                           |                                   |
| <b>Analysis</b>    | <b>Match (Case Group)</b> | <b>Outcome</b>             | <b>N Pairs</b> | <b>Time Point</b>          | <b>Case Estimate</b>     | <b>Control Estimate</b>     | <b>Difference in % and</b>                     | <b>Paired Cox</b>               | <b>Prentice-Wilcoxon</b>          |

|           |             |                               |      | Assessed | (%)  | (%)  | Bootstrapped<br>95% CI | Model<br>P-value | P-value* |
|-----------|-------------|-------------------------------|------|----------|------|------|------------------------|------------------|----------|
| Non-Black | Alemtuzumab | Death or<br>Allograft Failure | 3948 | 5 years  | 25.3 | 21.0 | 4.2<br>(2.4, 6.2)      | < 0.001          |          |
| Non-Black | Alemtuzumab | Death or Sepsis               | 3948 | 3 years  | 27.8 | 28.0 | -0.2<br>(-2.3, 1.9)    | 0.634            |          |
| Non-Black | Alemtuzumab | Death or<br>Lymphoma          | 3948 | 3 years  | 12.4 | 11.0 | 1.4<br>(-0.2, 2.9)     | 0.089            |          |
| Non-Black | Alemtuzumab | Death or<br>Melanoma          | 3948 | 3 years  | 12.1 | 10.9 | 1.1<br>(-0.5, 2.6)     | 0.091            |          |
| Non-Black | Basiliximab | Death                         | 7597 | 5 years  | 15.7 | 14.8 | 0.9<br>(-0.2, 2.0)     | 0.159            |          |
| Non-Black | Basiliximab | Death or<br>Allograft Failure | 7597 | 5 years  | 22.5 | 21.9 | 0.6<br>(-0.8, 1.9)     | 0.917            |          |
| Non-Black | Basiliximab | Death or Sepsis               | 7597 | 3 years  | 28.5 | 26.6 | 1.9<br>(0.3, 3.2)      | 0.209            | 0.088    |
| Non-Black | Basiliximab | Death or<br>Lymphoma          | 7597 | 3 years  | 12.2 | 10.7 | 1.5<br>(0.3, 2.6)      | 0.036            |          |
| Non-Black | Basiliximab | Death or<br>Melanoma          | 7597 | 3 years  | 11.9 | 10.4 | 1.5<br>(0.4, 2.6)      | 0.056            |          |

\*Presented only for Cox models that did not meet the proportional hazards assumption.



**FIGURE S1a.** Kaplan-Meier survival estimates alemtuzumab-rATG: survival (A), survival without allograft failure (B), survival without sepsis (C), survival without lymphoma (D), survival without melanoma (E)

**(A) Survival**

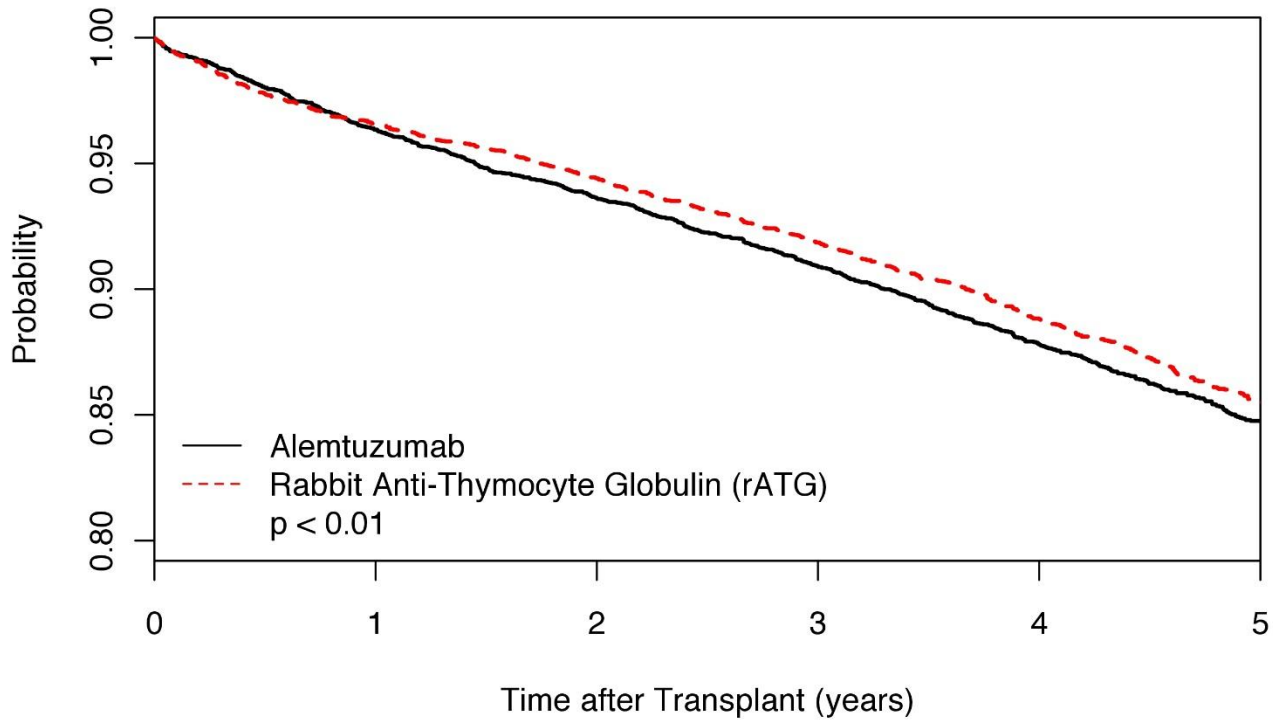

|                                              |      |      |      |      |      |
|----------------------------------------------|------|------|------|------|------|
| <u>Alemtuzumab</u>                           |      |      |      |      |      |
| 5330                                         | 5136 | 4991 | 4846 | 3613 | 2616 |
| <u>Rabbit Anti-Thymocyte Globulin (rATG)</u> |      |      |      |      |      |
| 5330                                         | 5148 | 5033 | 4896 | 3716 | 2647 |

### (B) Survival without Allograft Failure

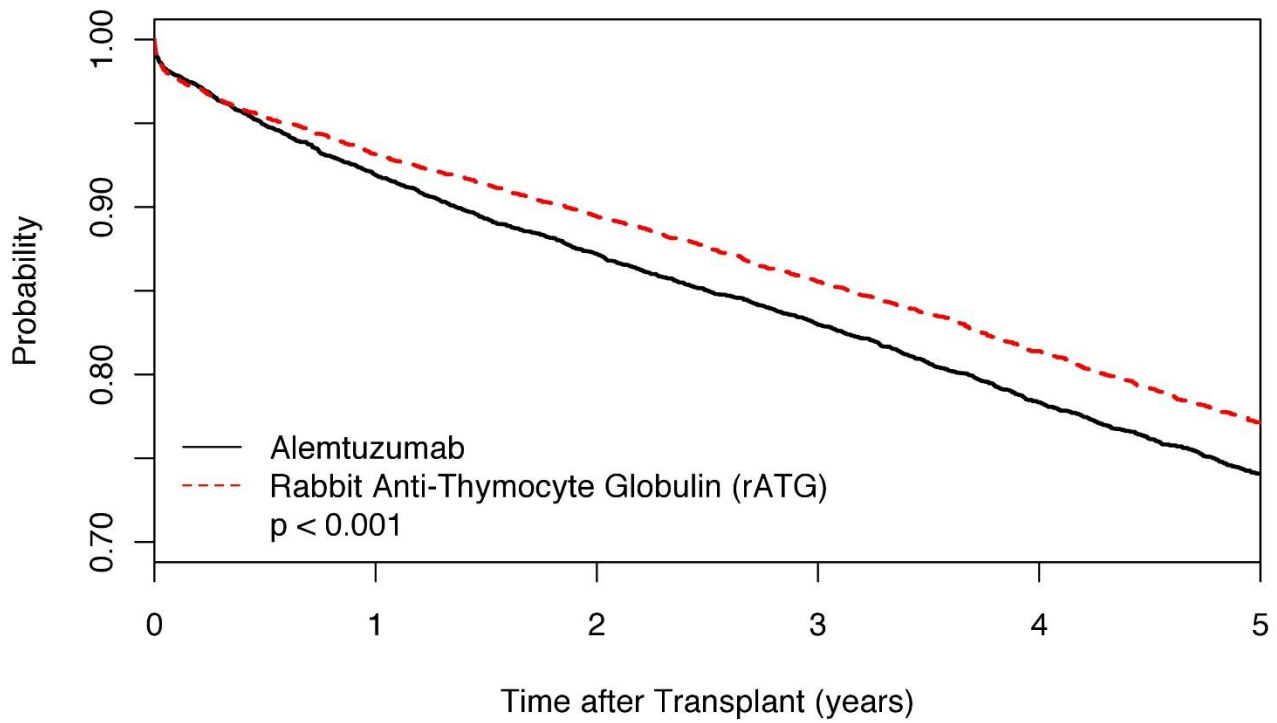

|                                              |      |      |      |      |      |
|----------------------------------------------|------|------|------|------|------|
| <u>Alemtuzumab</u>                           |      |      |      |      |      |
| 5330                                         | 4900 | 4649 | 4424 | 3200 | 2243 |
| <u>Rabbit Anti-Thymocyte Globulin (rATG)</u> |      |      |      |      |      |
| 5330                                         | 4966 | 4768 | 4562 | 3393 | 2364 |

### (C) Survival without Sepsis

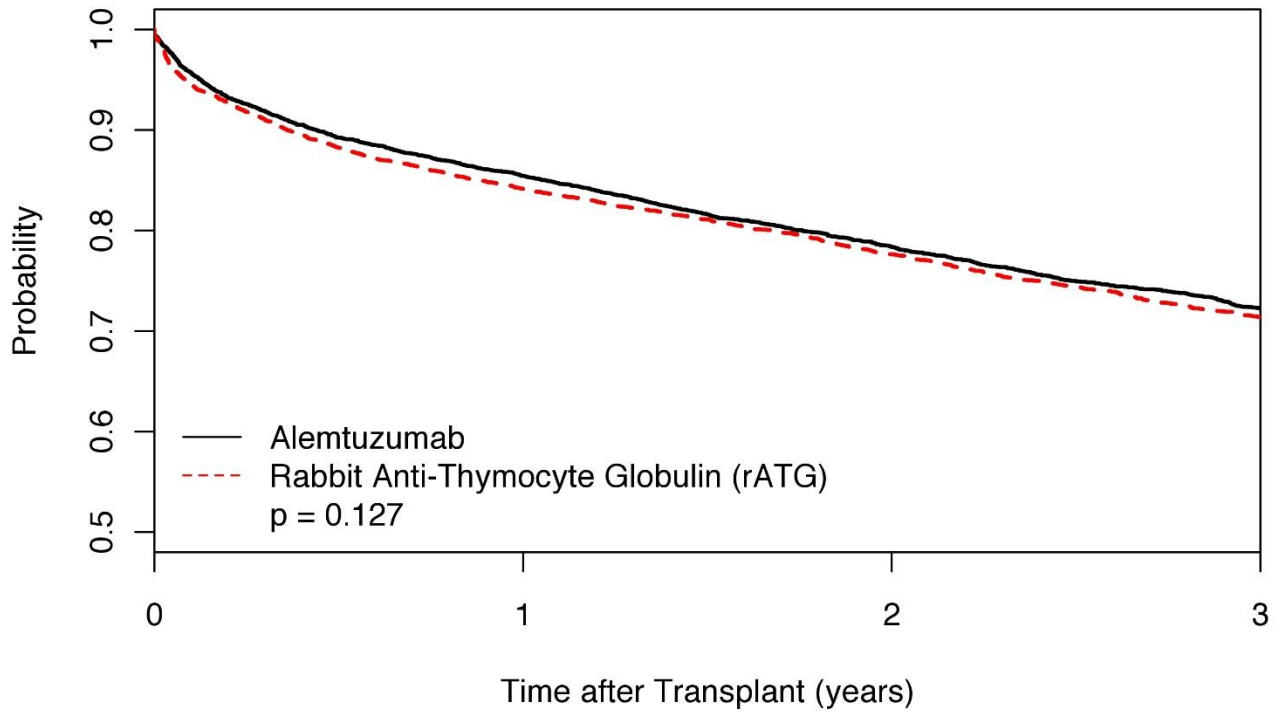

|                                              |      |      |      |
|----------------------------------------------|------|------|------|
| <u>Alemtuzumab</u>                           |      |      |      |
| 5330                                         | 4384 | 3003 | 2049 |
| <u>Rabbit Anti-Thymocyte Globulin (rATG)</u> |      |      |      |
| 5330                                         | 4320 | 3021 | 2049 |

### (D) Survival without Lymphoma

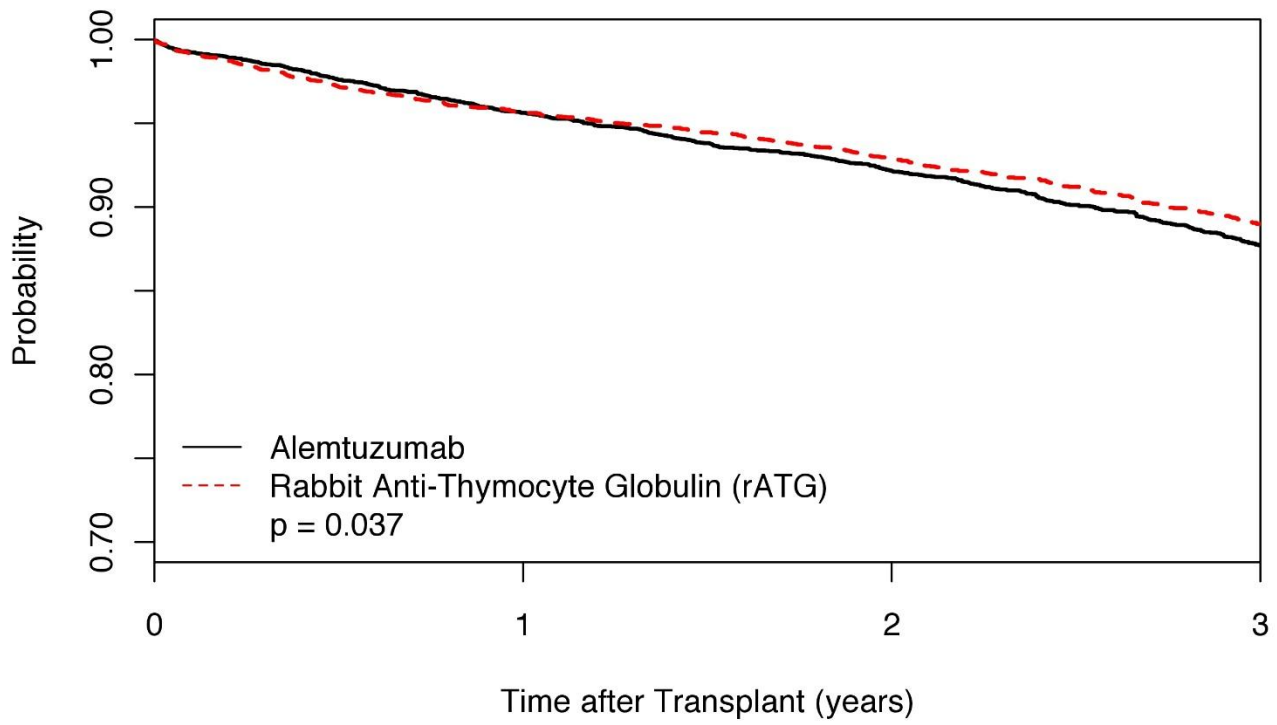

|                                              |      |      |      |
|----------------------------------------------|------|------|------|
| <u>Alemtuzumab</u>                           |      |      |      |
| 5330                                         | 4908 | 3550 | 2517 |
| <u>Rabbit Anti-Thymocyte Globulin (rATG)</u> |      |      |      |
| 5330                                         | 4912 | 3630 | 2580 |

### (E) Survival without Melanoma

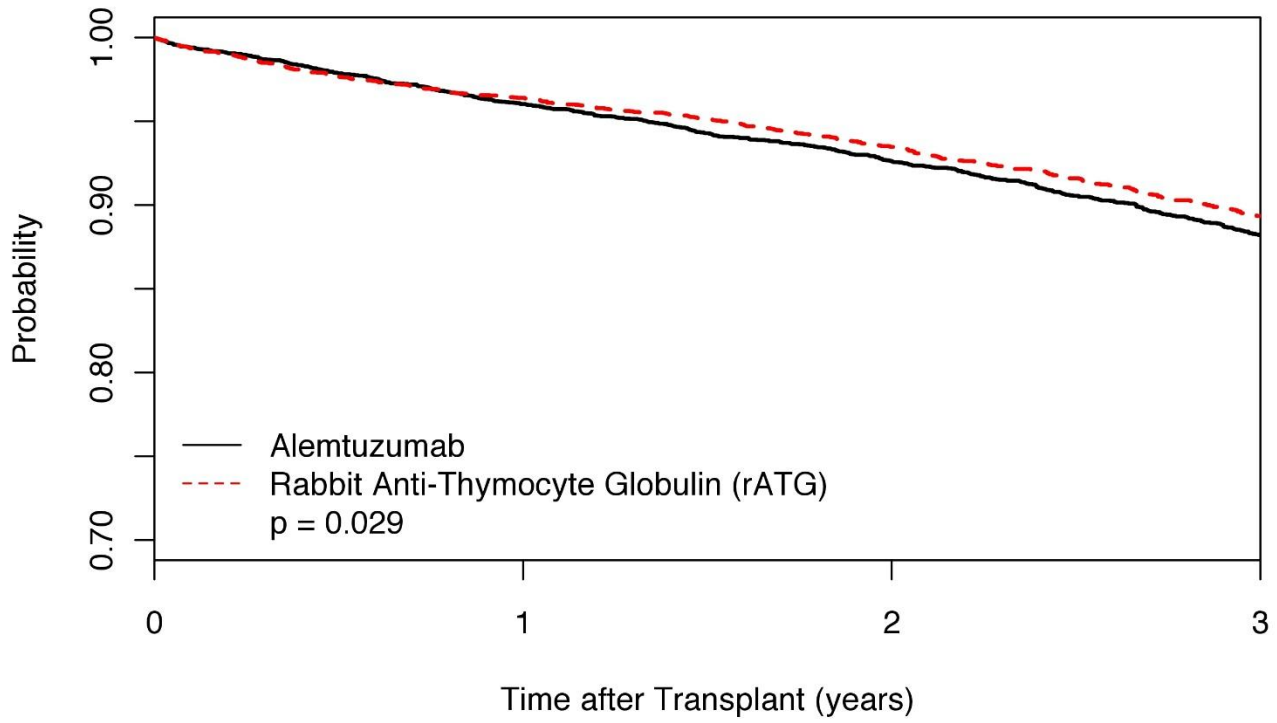

|                                              |      |      |      |
|----------------------------------------------|------|------|------|
| <u>Alemtuzumab</u>                           |      |      |      |
| 5330                                         | 4929 | 3568 | 2534 |
| <u>Rabbit Anti-Thymocyte Globulin (rATG)</u> |      |      |      |
| 5330                                         | 4949 | 3654 | 2590 |

**FIGURE S1b.** Kaplan-Meier survival estimates Basiliximab-rATG: survival (A), survival without allograft failure (B), survival without sepsis (C), survival without lymphoma (D), survival without melanoma (E)

**(A) Survival**

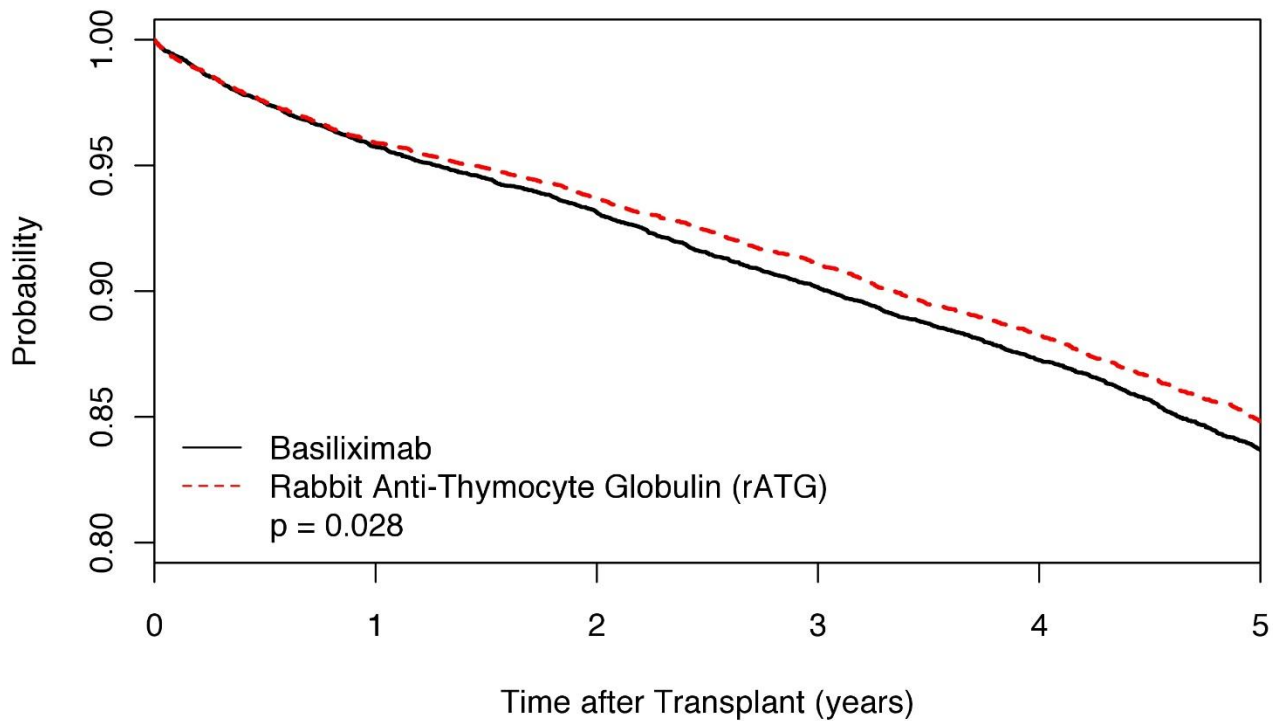

|                                              |      |      |      |      |      |  |
|----------------------------------------------|------|------|------|------|------|--|
| <u>Basiliximab</u>                           |      |      |      |      |      |  |
| 9378                                         | 8979 | 8736 | 8456 | 6934 | 5407 |  |
| <u>Rabbit Anti-Thymocyte Globulin (rATG)</u> |      |      |      |      |      |  |
| 9378                                         | 8994 | 8786 | 8542 | 7000 | 5427 |  |

### (B) Survival without Allograft Failure

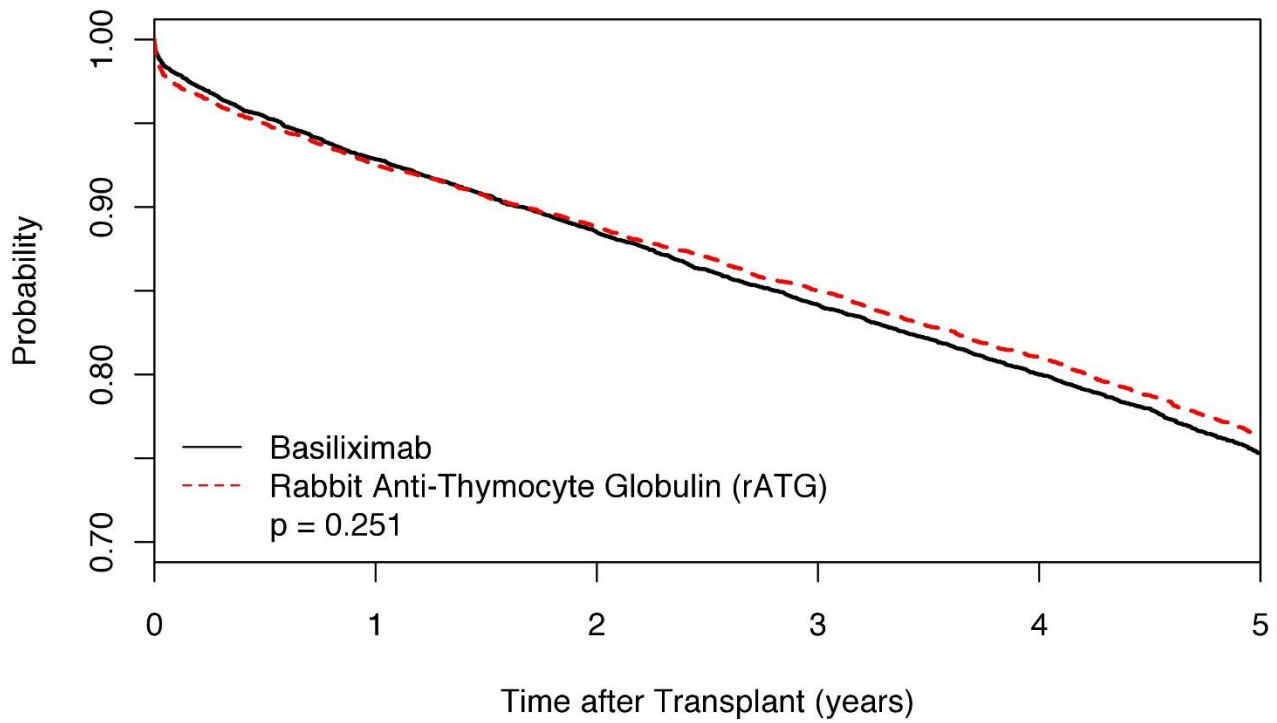

|                                              |      |      |      |      |      |
|----------------------------------------------|------|------|------|------|------|
| <u>Basiliximab</u>                           |      |      |      |      |      |
| 9378                                         | 8709 | 8301 | 7894 | 6335 | 4827 |
| <u>Rabbit Anti-Thymocyte Globulin (rATG)</u> |      |      |      |      |      |
| 9378                                         | 8676 | 8328 | 7972 | 6398 | 4835 |

### (C) Survival without Sepsis

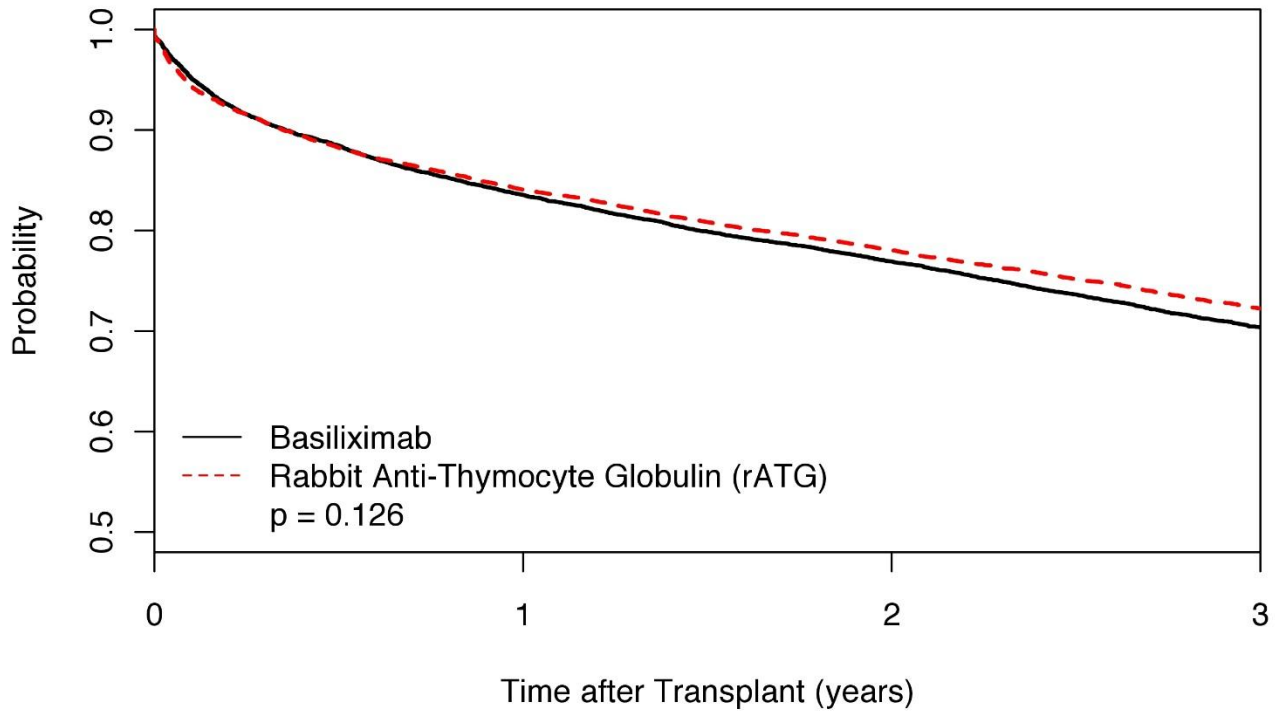

|                                              |      |      |      |
|----------------------------------------------|------|------|------|
| <u>Basiliximab</u>                           |      |      |      |
| 9378                                         | 7599 | 5751 | 4228 |
| <u>Rabbit Anti-Thymocyte Globulin (rATG)</u> |      |      |      |
| 9378                                         | 7649 | 5815 | 4284 |



### (D) Survival without Lymphoma

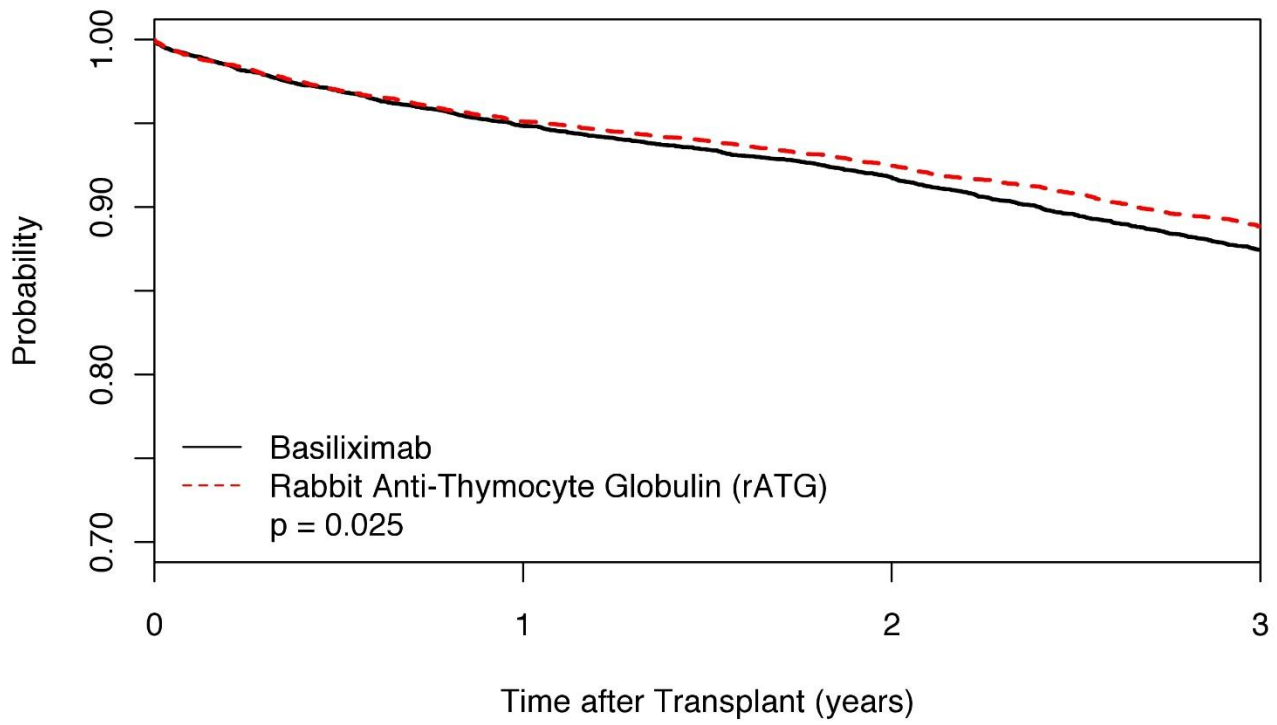

|                                              |      |      |      |
|----------------------------------------------|------|------|------|
| <u>Basiliximab</u>                           |      |      |      |
| 9378                                         | 8625 | 6860 | 5270 |
| <u>Rabbit Anti-Thymocyte Globulin (rATG)</u> |      |      |      |
| 9378                                         | 8649 | 6905 | 5314 |

### (E) Survival without Melanoma

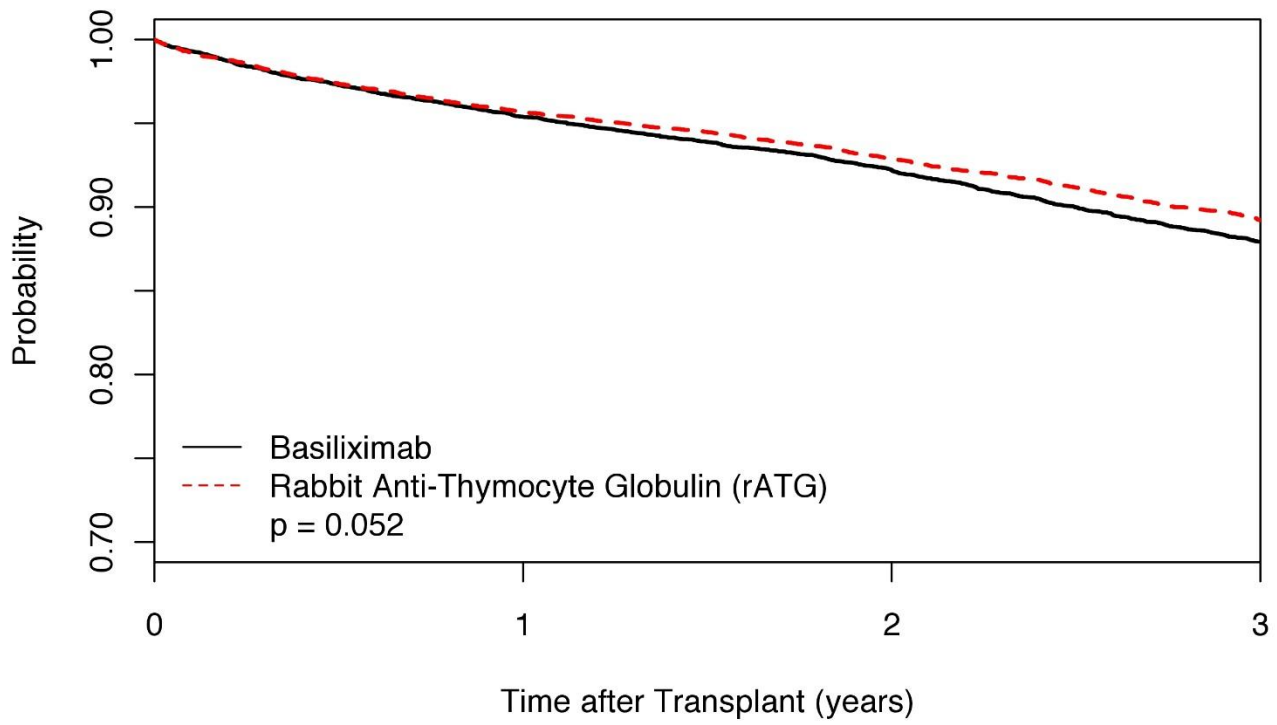

|                                              |      |      |      |
|----------------------------------------------|------|------|------|
| <u>Basiliximab</u>                           |      |      |      |
| 9378                                         | 8676 | 6895 | 5304 |
| <u>Rabbit Anti-Thymocyte Globulin (rATG)</u> |      |      |      |
| 9378                                         | 8701 | 6941 | 5329 |

## **APPENDIX V. Additional Information about Methods**

### **A. Cohort generation: Induction therapies excluded**

Patients who received the following induction therapies were excluded from the cohort: alg, anti-cam-1, anti-IL-6, anti-LFA-1, anti-tnf, atg, IL-1-receptor antagonist, okt3, okt4, rituximab, t10b9, xomazymecd5, zenapax, soluble il-1 receptor, nrATGnrats. We also excluded 738 patients for receiving “atg” as their induction therapy, because "atg" was consistent with atgam, a different preparation of anti-thymocyte globulin than rATG<sup>1,2</sup>

## REFERENCES

1. Hardinger KL, Rhee S, Buchanan P, et al. A prospective, randomized, double-blinded comparison of rATG versus Atgam for induction immunosuppressive therapy: 10-year results. *Transplantation*. 2008;86(7):947-952. doi:10.1097/TP.0b013e318187bc67.
2. Brennan DC, Flavin K, Lowell JA, et al. A randomized, double-blinded comparison of rATG versus Atgam for induction immunosuppressive therapy in adult renal transplant recipients. *Transplantation*. 1999;67(7):1011-1018.
